# Supplementary material
Source: PubMed Central journal article supplement (PMC5086553)
Supplement: AEM.02176-16_zam999117505so1.pdf [file AEM.02176-16_zam999117505so1.pdf]

# **Molecular Insights in the Cleavage of Rubber by the Latex-Clearing-Protein (Lcp) of *Streptomyces* sp. strain K30**

## **Supplementary material**

*Wolf Röther, Stefanie Austen, Jakob Birke and Dieter Jendrossek*

*Institute of Microbiology, University of Stuttgart, Germany*

1. Alignment of 1280 DUF2236 amino acid sequences
2. UVvis spectra
3. Graphs of the oxygen consumption assays
4. HPLC chromatograms of separated polyisoprene cleavage products
5. List of amino acid sequence identifiers

1. Multi-sequence alignment of 1280 amino acid sequences containing the domain of unknown function DUF2236. 6598 sequences containing the DUF2236 were accessible with the identifier IPR018713 in the interpro database (June 2016). The first 1500 prokaryotic sequences were used and sequences shorter than 250 and longer than 450 residues were removed. This led to 1280 sequences that were used for a multiple sequence alignment (Clustal Omega). The sequences of Lcp<sub>K30</sub>, Lcp<sub>Rf</sub> and Lcp<sub>VH2</sub> are provided for comparison, numbering refers to Lcp<sub>K30</sub>. Values of conservation > 80 % were observed for residues R164, T168 and H198. The degree of conservation of each residue is represented by the height of the column.

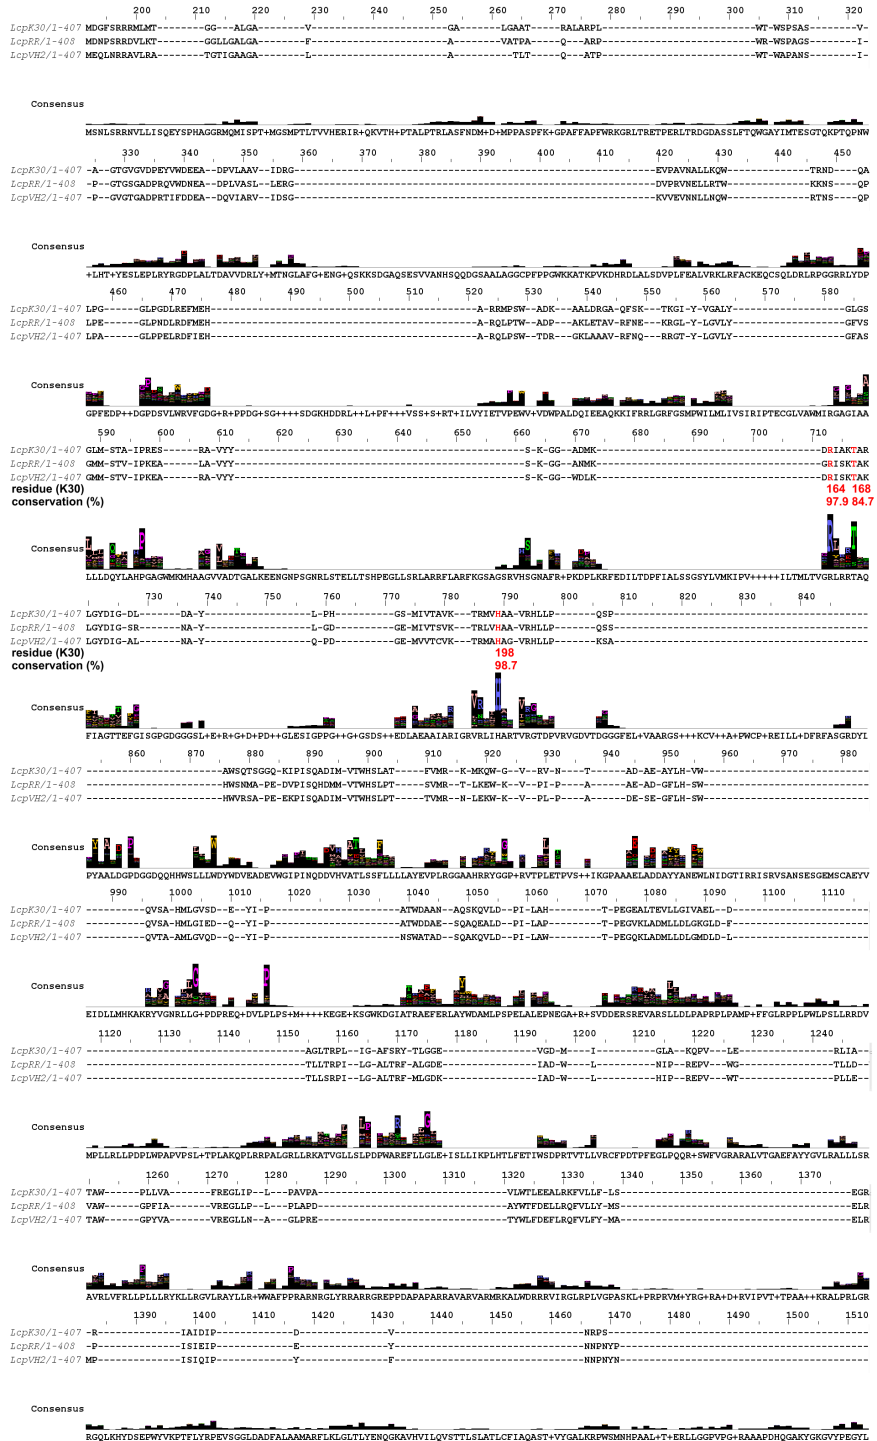

2. **UVvis spectra of Lcp<sub>K30</sub> wild type (from *Streptomyces* sp. K30), Lcp<sub>Rr</sub> (from *R. rhodochrous* PRK1) and the Lcp<sub>K30</sub> mutants purified in this study.** Black lines refer to the *as isolated* states, red lines to the states after reduction with sodium dithionite and green lines to the spectra that were recorded after the addition of 10 mM imidazole to the reduced protein and incubation for 10 to 15 minutes at room temperature. The Q-band region is enlarged in the insets for the heme-containing mutants.

a. **Lcp<sub>K30</sub> wild type.** In the *as isolated* state (black), a strong absorbance at 412 nm was observed (Soret band) as well as a 544 nm  $\beta$ -band. After chemical reduction (red line) a shift of the Soret band to 430 nm was detected and the Q-bands absorbed at 532 nm ( $\beta$ ) and 562 nm ( $\alpha$ ). Addition of imidazole (green line) resulted in no increase of absorbance at 430 and 562 nm, indicating no accessibility for imidazole to the heme site and thereby suggesting a heme coordination by two axial amino acid heme ligands (closed state).

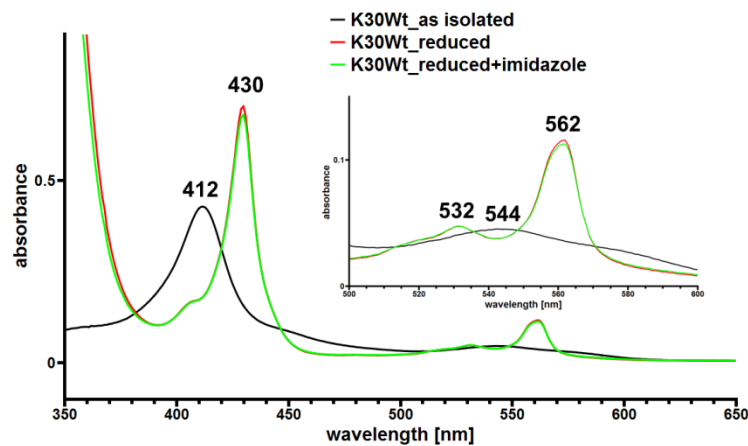

b. **Lcp<sub>Rr</sub> wild type.** In the *as isolated* state (black) the Soret  $\alpha$  band showed a maximum at 407 nm as well as a 535 nm band. After chemical reduction (red line) a shift to 428 nm occurs and the Q bands had maxima at 531 and 560 nm. A strong increase of absorbance at 430 and 560 nm after addition of imidazole (green line) was observed, indicating an open, accessible state suggesting the absence of an amino acid as a second heme ligand.

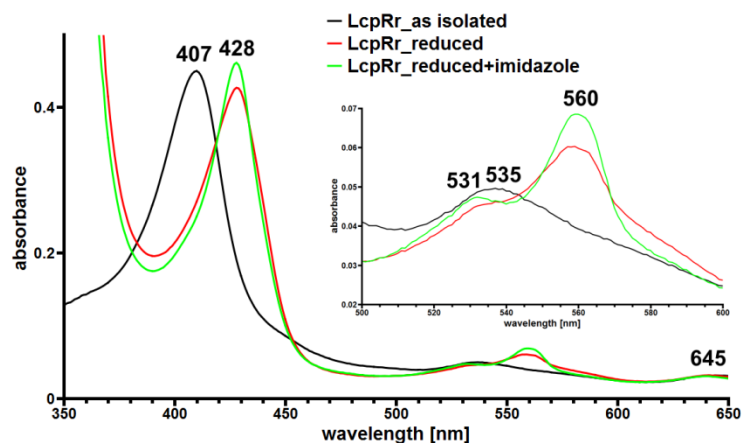

- c. **Lcp<sub>K30</sub> mutain H198A**. In the *as isolated* state (black line) only a strong absorbance at 280 but no Soret band (absorbance around 400 nm) was observed, indicating the absence of heme.

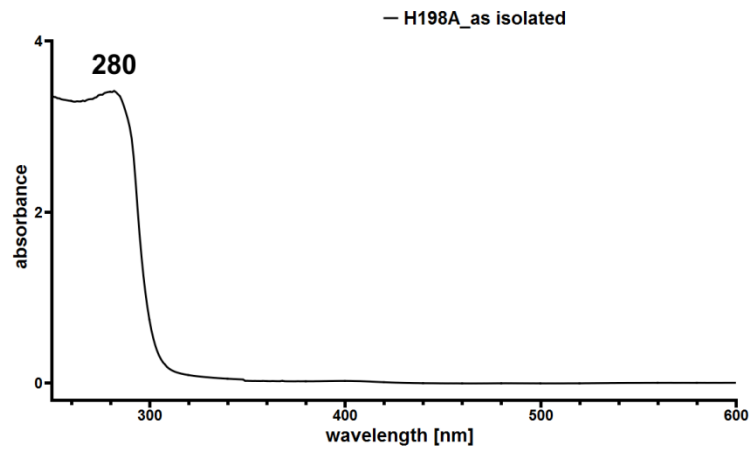

- d. **Lcp<sub>K30</sub> mutain H203A**. Spectrum comparable to Lcp<sub>K30</sub> wild type

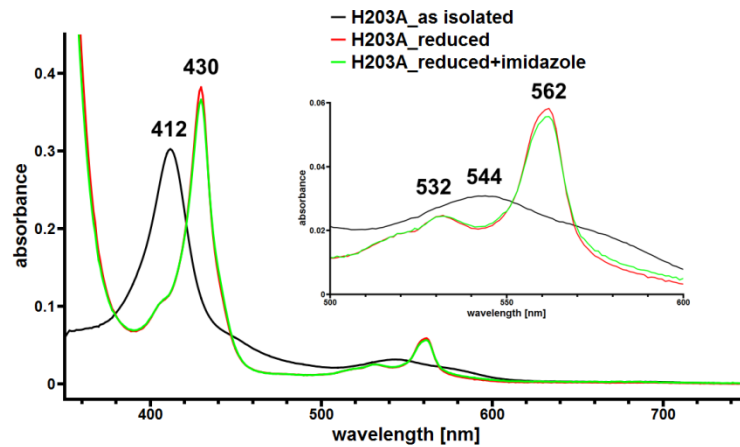

- Lcp<sub>K30</sub> mutain H232A**. Spectrum comparable to Lcp<sub>K30</sub> wild type.

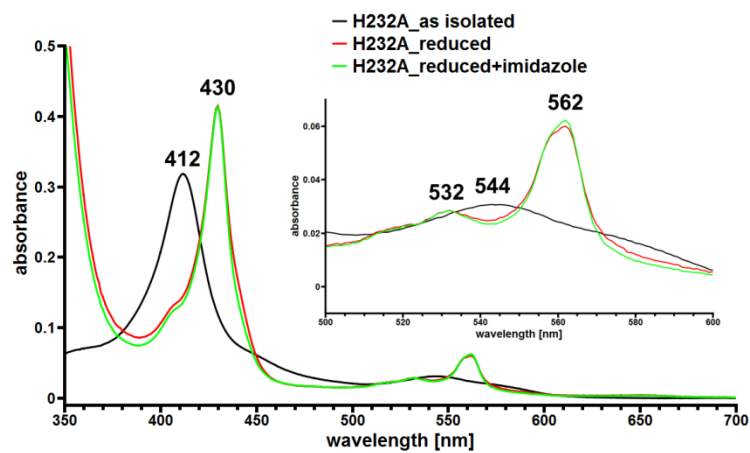

- e. **Lcp<sub>K30</sub> mutain H259A**. Spectrum comparable to Lcp<sub>K30</sub> wild type. Due to low yield, only a small amount of the protein was used for spectroscopic characterization.

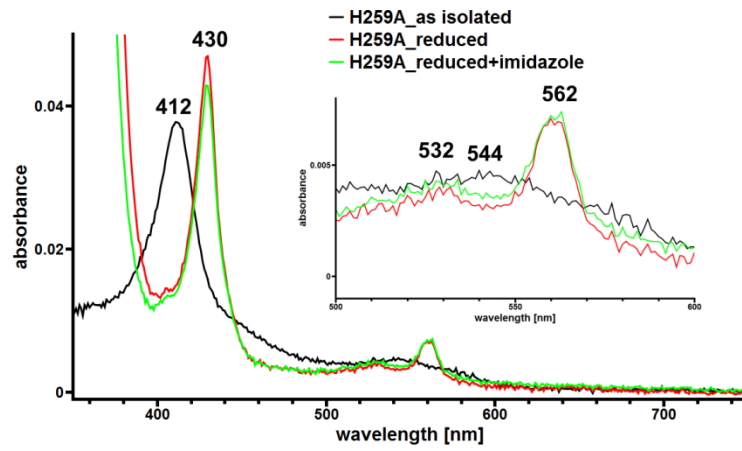

- f. **Lcp<sub>K30</sub> mutain H266A**. Spectrum comparable to Lcp<sub>K30</sub> wild type.

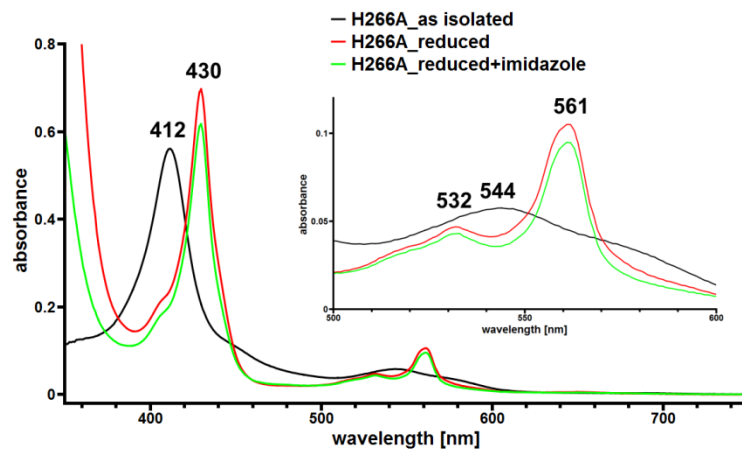

- g. **Lcp<sub>K30</sub> mutein R195A**. In the *as isolated* state (black line) only a strong absorbance at 280 nm but no Soret band (absorbance around 400 nm) was observed, indicating the absence of heme.

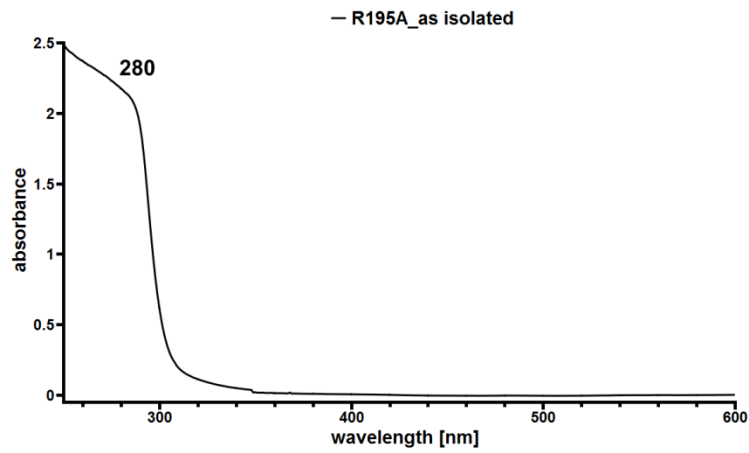

- h. **Lcp<sub>K30</sub> mutein R202A**. In the *as isolated* state (black line) a strong absorbance at 280 nm and a very weak Soret band (weak absorbance around 411 nm) was observed, indicating the presence of heme in only a minor fraction of mutein molecules. Due to instability of the Lcp<sub>K30</sub> mutein R202A no spectra after reduction or with the potential heme ligand imidazole were recorded.

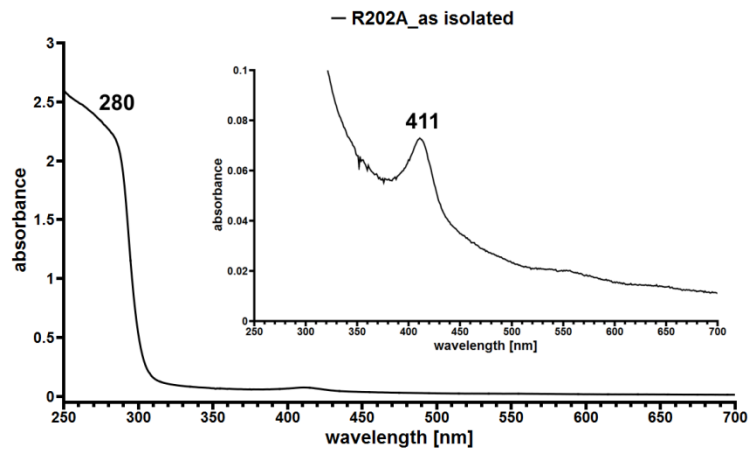

- i. **Lcp<sub>K30</sub> mutain R328A**. Spectrum comparable to Lcp<sub>K30</sub> wild type. The slight decrease in absorption after addition of imidazole can be explained by partial degradation of the protein upon the addition of dithionite.

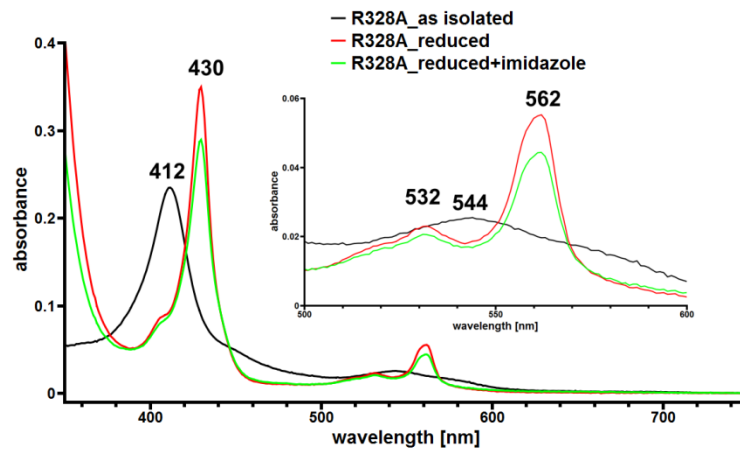

**3. Oxygen consumption assays during polyisoprene cleavage.** The degree of oxygen saturation of potassium phosphate buffer supplemented with 0.2% polyisoprene latex was recorded at 22°C in four cuvettes equipped with fluorescence sensor spots and the oxy-4-mini apparatus. After a constant oxygen concentration was recorded (3-5 min), 4 µg of the indicated purified protein (if not stated otherwise, blank without enzyme) was added. Assays with two cuvettes supplemented with the same mutein (A-1, A-2) were repeated at least three times; one representative data set is shown. Black line refers to activity of wild type Lcp<sub>K30</sub> in all assays.

- a. **Lcp<sub>K30</sub> R164A**, DUF 2236 residue, red, heme containing mutein albeit no consumption of oxygen was observed, indicating inactivity of the mutein and identifying Lcp<sub>K30</sub> R164A as an essential residue for the catalytic mechanism. (Note: no residual activity could be shown by HPLC analysis).

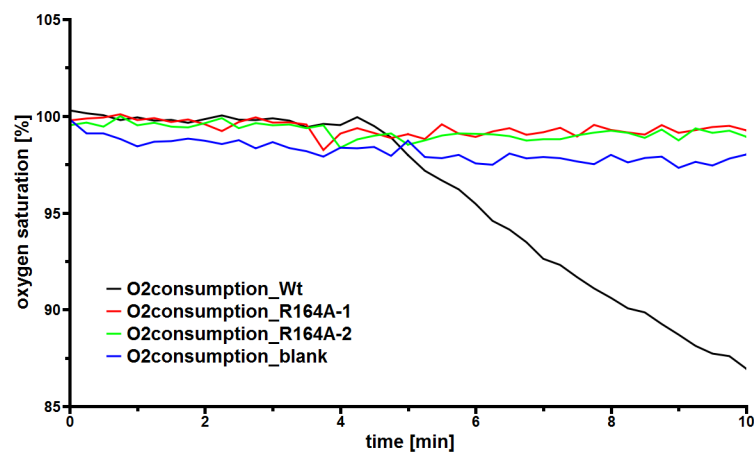

- b. **Lcp<sub>K30</sub> T168A**, DUF 2236 residue, red, heme containing mutein albeit no consumption of oxygen was observed, indicating inactivity or very low activity of the mutein and identifying Lcp<sub>K30</sub> T168A as an important residue for the catalytic mechanism. (Note: minor residual activity shown by HPLC analysis).

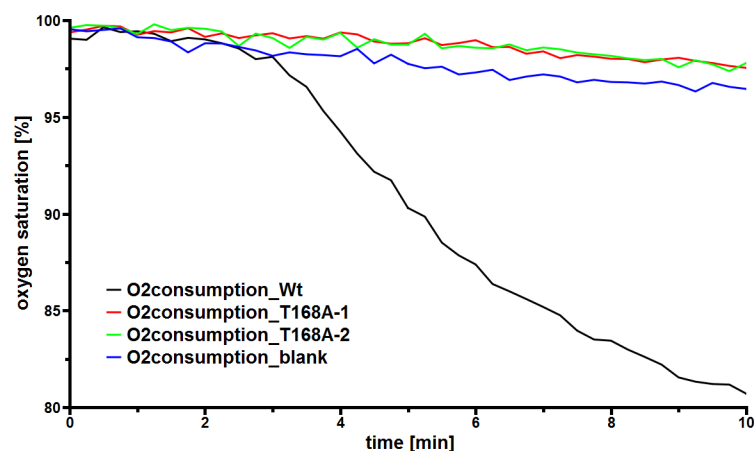



- c. **Lcp<sub>K30</sub> H198A**, colorless mutain containing no heme group. No consumption of oxygen was observed for 4 and 20 μg enzyme, indicating inactivity of the mutain. (Note: no residual activity could be shown by HPLC analysis).

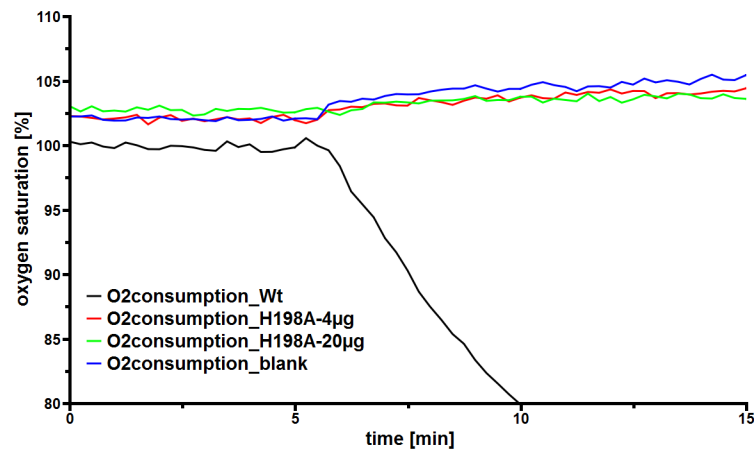

- d. **Lcp<sub>K30</sub> H203A**, red, heme containing mutain showing consumption of oxygen comparable to Lcp<sub>K30</sub> wild type indicating no importance for the catalytic mechanism.

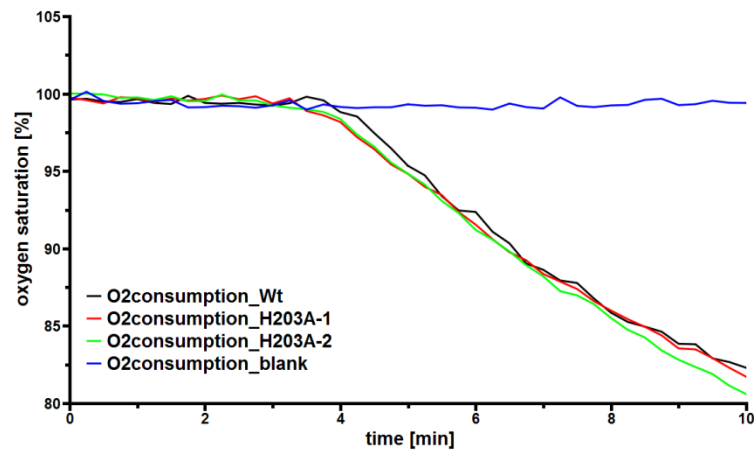

- e. **Lcp<sub>K30</sub> H232A**, red, heme containing mutain showing consumption of oxygen comparable to Lcp<sub>K30</sub> wild type indicating no importance for the catalytic mechanism.

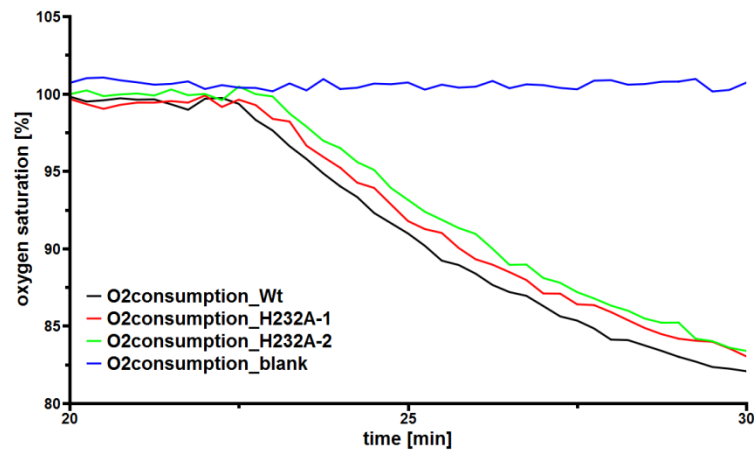

- f. **Lcp<sub>K30</sub> H259A**, red, heme containing mutain showing consumption of oxygen comparable to Lcp<sub>K30</sub> wild type indicating no importance for the catalytic mechanism.

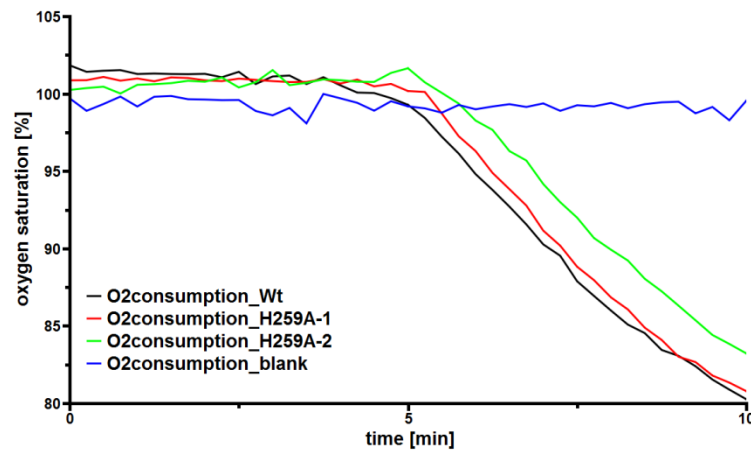

- g. **Lcp<sub>K30</sub> H266A**, red, heme containing mutain showing consumption of oxygen comparable to Lcp<sub>K30</sub> wild type indicating no importance for the catalytic mechanism.

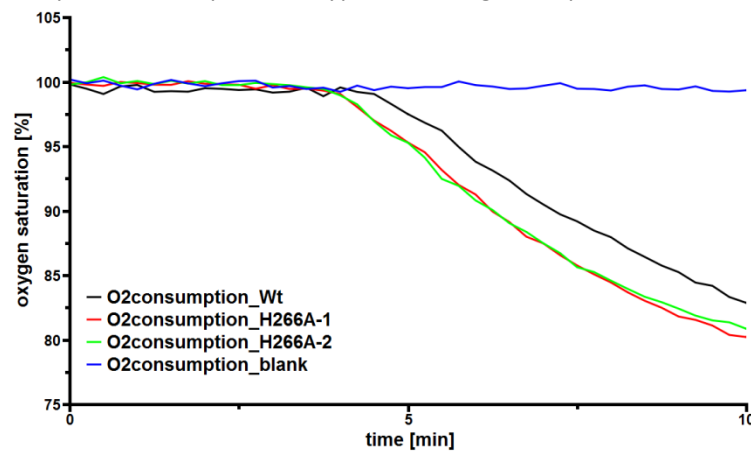

- h. **Lcp<sub>K30</sub> R195A**, instable, colorless mutain not containing a heme group and no consumption of oxygen was observed, indicating inactivity of the mutain. (Note: no residual activity could be shown by HPLC analysis).

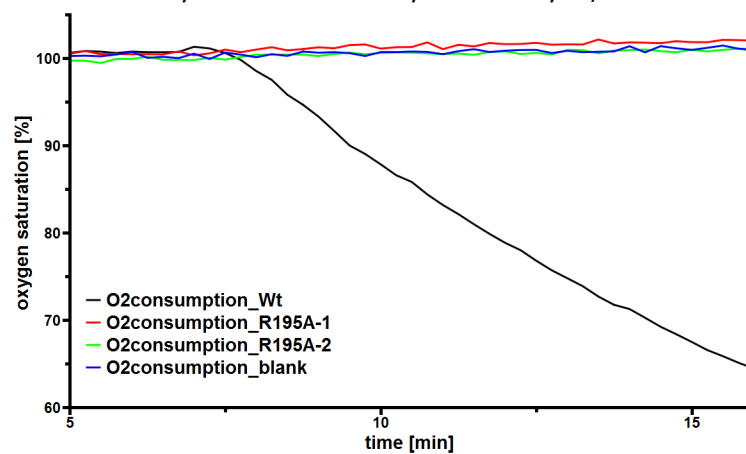

- i. **Lcp<sub>K30</sub> R202A**, instable mutain. Only a few molecules of the mutain protein contained a heme group as revealed by a very weak Soret band. Only very low consumption of oxygen was observed even for 50µg enzyme. (Note: a minor residual activity could be shown by HPLC analysis for 50 µg enzyme).

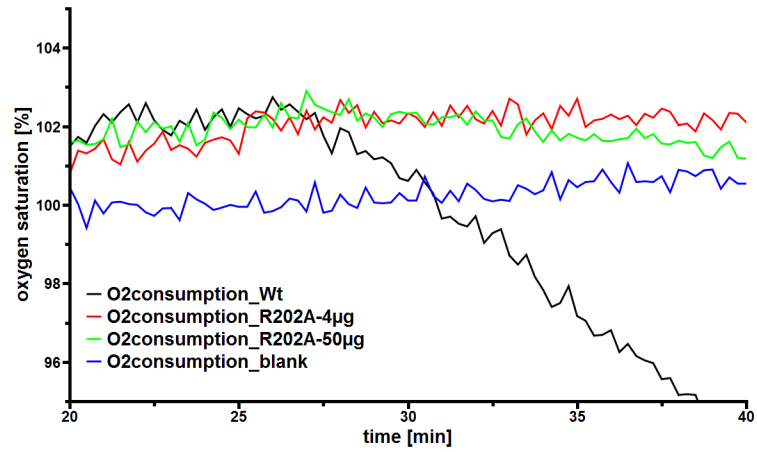

4. **HPLC chromatograms of Lcp<sub>K30</sub>-generated cleavage products.** 4 µg of each enzyme was incubated in 1 ml potassium phosphate buffer supplemented with 0.2% latex for 2 hours at 22°C (for R164A and R195A, 25µg, for H198A 20 µg were incubated for 16 hours, in case of R202A, 50µg were used for 16 hours). The reaction mixtures were extracted with ethyl acetate after incubation and the solvent was evaporated. The formed cleavage products were dissolved in 100 µl methanol and analyzed by HPLC (RP8 column and methanol:water gradient from 50 to 100 % methanol, detection at 210nm). A blank without enzyme was prepared and was subtracted from the chromatogram with protein. Lcp<sub>K30</sub> wild type served as positive control. For the wild type, the chemical formula of the formed oligo-isoprenoids with varying number (n=2 to 6) of isoprene units is shown.

- a. **Lcp<sub>K30</sub> wild type**, red, heme containing protein producing oligo-isoprenoids with varying number of isoprene units (n=2 to 6) resulting in a typical pattern that indicated a random (endo) cleavage mechanism.

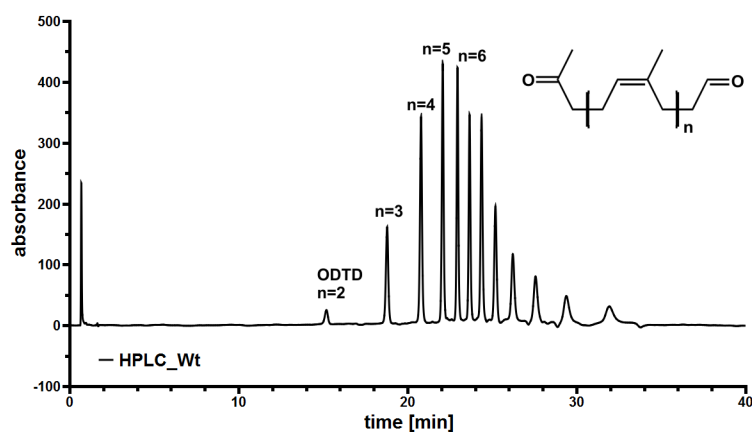

- b. **Lcp<sub>K30</sub> R164A**, DUF2236 residue, red, heme containing. 25 µg were incubated for 16 hours but no cleavage products could be observed identifying R164A as an essential residue for the catalytic reaction.

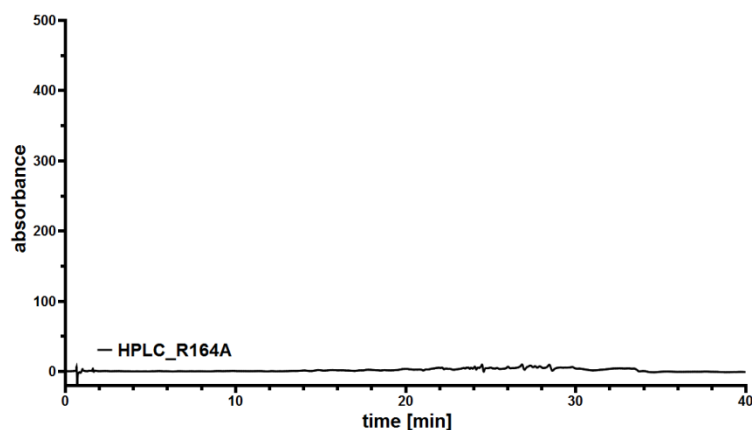

- c. **Lcp<sub>K30</sub> H198A**, DUF2236 residue, colorless, containing no heme. 20 µg were incubated for 16 hours but no cleavage products could be observed identifying H198A as an essential residue for the catalytic reaction.

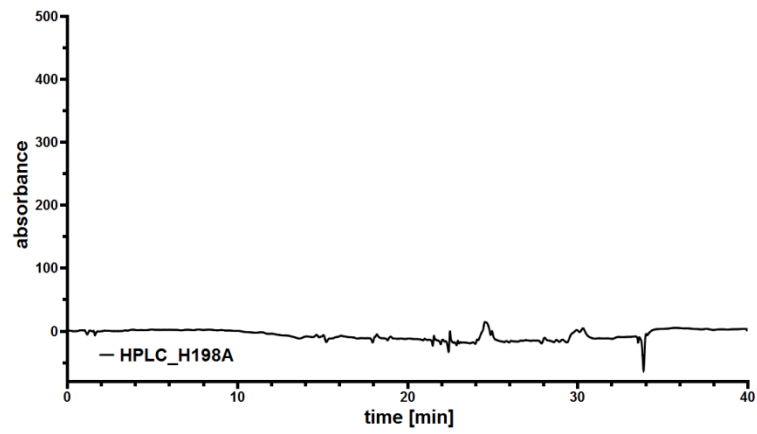

- d. **Lcp<sub>K30</sub> H203A**, red, heme containing mutain showing a pattern of separated polyisoprene cleavage products similar to Lcp<sub>K30</sub> wild type indicating no importance for the catalytic mechanism.

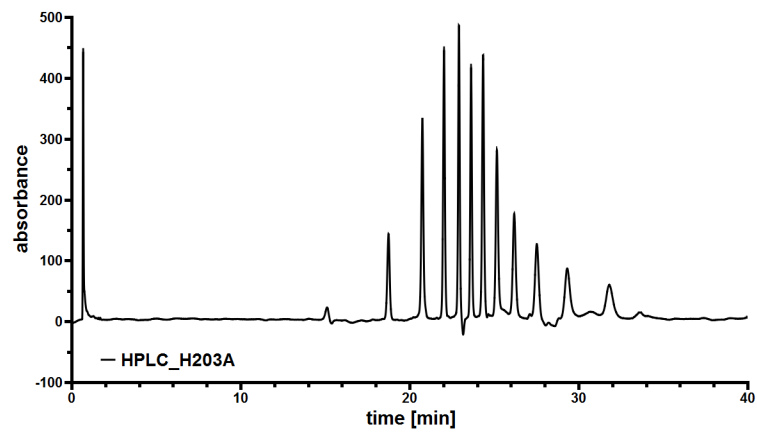

- e. **Lcp<sub>K30</sub> H232A**, red, heme containing mutain showing a pattern of separated polyisoprene cleavage products similar to Lcp<sub>K30</sub> wild type indicating no importance for the catalytic mechanism.

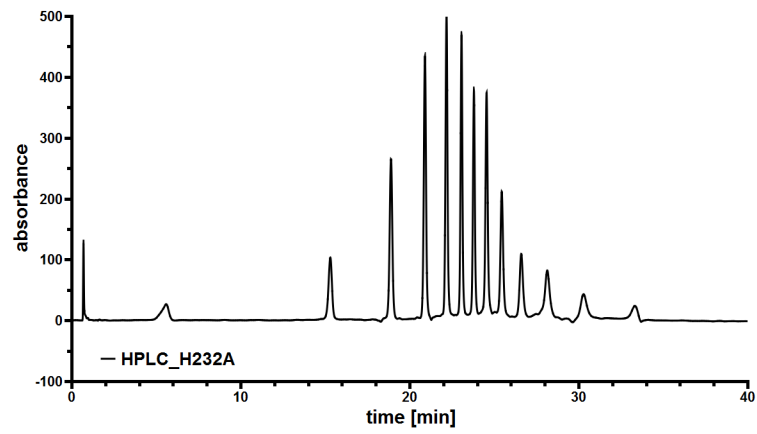

- f. **Lcp<sub>K30</sub> H259A**, red, heme containing mutain showing a pattern of separated polyisoprene cleavage products similar to Lcp<sub>K30</sub> wild type indicating no importance for the catalytic mechanism.

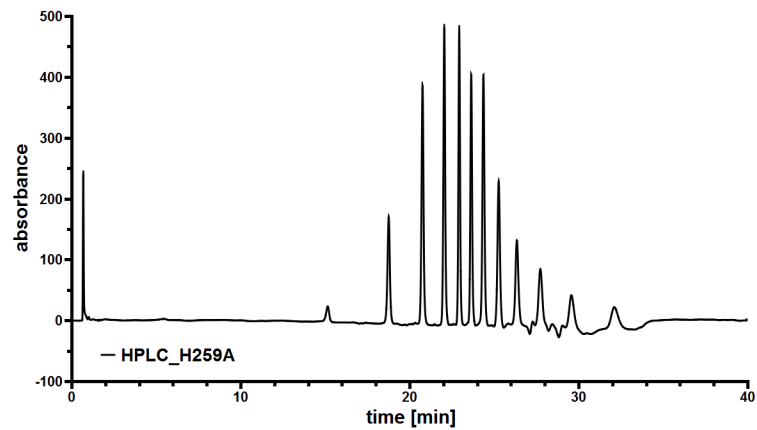

- g. **Lcp<sub>K30</sub> H266A**, red, heme containing mutain showing a pattern of separated polyisoprene cleavage products similar to Lcp<sub>K30</sub> wild type indicating no importance for the catalytic mechanism.

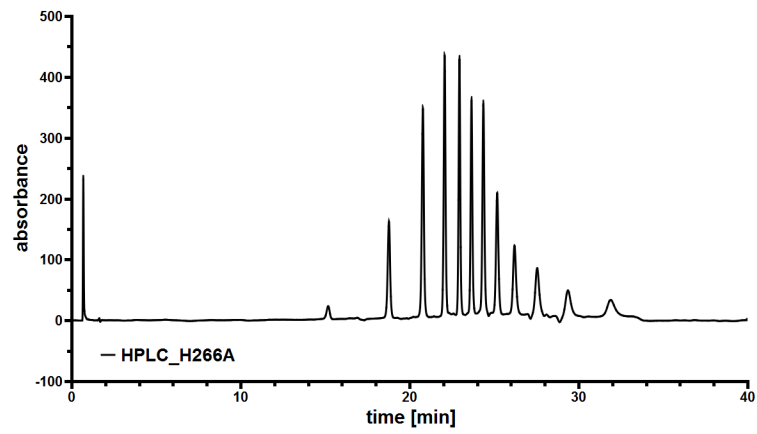

- h. **Lcp<sub>K30</sub> R195A**, colorless, instable mutain containing no heme. 25  $\mu$ g were incubated for 16 hours but no cleavage products could be observed.

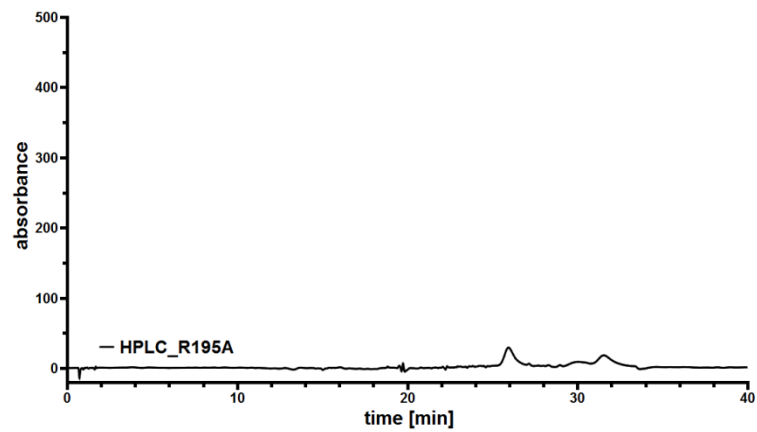

- i. **Lcp<sub>K30</sub> R202A**, instable mutein. Only a few molecules of the mutein contained a heme group as revealed a very weak Soret band. 50 µg were incubated for 16 hours and a very low yield of cleavage products with the same pattern as observed for Lcp<sub>K30</sub> wild type could be observed being in agreement with the observed instability of the mutein.

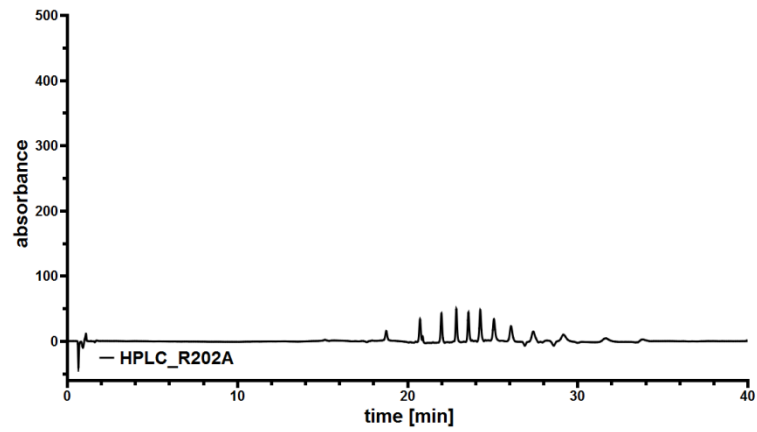



## 5. List of amino acid sequence identifiers used for the multiple sequence alignments.

1280 identifiers of the sequences containing the DUF2236 used for Figure S1.

|                  |                  |                  |                  |
|------------------|------------------|------------------|------------------|
| LcpK30/1-407     | A0A0F5F7H9/1-291 | A0A0E4AD53/1-305 | A0A0E2CJ5/1-372  |
| LcpRR/1-408      | A0A0F5ADN0/1-311 | A0A0E4ACI5/1-289 | A0A0E2BS74/1-372 |
| LcpVH2/1-407     | A0A0F4Z2N9/1-330 | A0A0E4A2K6/1-298 | A0A0E2B030/1-372 |
| Q3L8N0/1-407     | A0A0F4YVV3/1-442 | A0A0E4A1N6/1-285 | A0A0E1WB16/1-318 |
| P9WLH1/1-255     | A0A0F4YNW3/1-478 | A0A0E3ZKL6/1-289 | A0A0E1UF60/1-318 |
| P9WLH0/1-255     | A0A0F4VF63/1-290 | A0A0E3YQ18/1-317 | A0A0E1U788/1-318 |
| P64958/1-255     | A0A0F4TIR6/1-290 | A0A0E3YAK1/1-328 | A0A0E1SB74/1-318 |
| A0A0G2ZT22/1-375 | A0A0F4T3B4/1-290 | A0A0E3XTQ0/1-341 | A0A0E1PVB1/1-404 |
| A0A0G2ZSQ0/1-384 | A0A0F4STK4/1-290 | A0A0E3XTK1/1-393 | A0A0E1JV39/1-404 |
| A0A0G2ZL99/1-335 | A0A0F4KBM2/1-297 | A0A0E3XS80/1-452 | A0A0E1EFV2/1-288 |
| A0A0G2ZID7/1-446 | A0A0F4K6B5/1-304 | A0A0E3XRP7/1-449 | A0A0E1CIB1/1-296 |
| A0A0G2ZE11/1-380 | A0A0F4JX08/1-458 | A0A0E3XQL1/1-454 | A0A0E1B570/1-293 |
| A0A0G2J9M8/1-299 | A0A0F4JRP0/1-304 | A0A0E3XNM6/1-316 | A0A0E0WZF0/1-289 |
| A0A0G2J8W2/1-365 | A0A0F4JLQ4/1-299 | A0A0E3XMD6/1-336 | A0A0D9QBZ7/1-301 |
| A0A0G2J5Q8/1-448 | A0A0F4JGG7/1-373 | A0A0E3XLJ4/1-302 | A0A0D9Q1U7/1-429 |
| A0A0G2ID28/1-425 | A0A0F4JAG2/1-309 | A0A0E3WDQ6/1-352 | A0A0D9PR28/1-385 |
| A0A0G2F455/1-413 | A0A0F4J9X3/1-412 | A0A0E3WCC3/1-343 | A0A0D9PBU6/1-429 |
| A0A0G2ENY3/1-425 | A0A0F4J5T5/1-317 | A0A0E3VG69/1-316 | A0A0D9P545/1-301 |
| A0A0G0A0W7/1-425 | A0A0F4IZF3/1-293 | A0A0E3VD89/1-291 | A0A0D9NXA7/1-385 |
| A0A0F9XMR6/1-458 | A0A0F4IMV4/1-302 | A0A0E3VBX1/1-313 | A0A0D9N4C9/1-304 |
| A0A0F7XT94/1-289 | A0A0F4IM85/1-395 | A0A0E3VAR6/1-262 | A0A0D9N459/1-305 |
| A0A0F7W9R6/1-291 | A0A0F4IG83/1-298 | A0A0E3V8M9/1-350 | A0A0D9MZI1/1-388 |
| A0A0F7W9E8/1-407 | A0A0F4ICV6/1-304 | A0A0E3UZ79/1-254 | A0A0D9MY56/1-292 |
| A0A0F7W7R2/1-409 | A0A0F4I737/1-296 | A0A0E3UNK6/1-305 | A0A0D9MXJ4/1-471 |
| A0A0F7W4A7/1-371 | A0A0F3LYM4/1-287 | A0A0E3TUE4/1-315 | A0A0D9M071/1-347 |
| A0A0F7VY16/1-327 | A0A0F3KS19/1-316 | A0A0E3TUD4/1-338 | A0A0D9LVN6/1-309 |
| A0A0F7VDT9/1-428 | A0A0F3I800/1-300 | A0A0E3TST5/1-311 | A0A0D9LFD2/1-420 |
| A0A0F7T237/1-297 | A0A0F3I7Q3/1-310 | A0A0E3TRS7/1-348 | A0A0D9ARQ5/1-291 |
| A0A0F7TTD8/1-460 | A0A0F3GG30/1-290 | A0A0E3TRS3/1-405 | A0A0D9A7G0/1-290 |
| A0A0F7TLJ8/1-302 | A0A0F2T673/1-416 | A0A0E3TRQ2/1-369 | A0A0D8I4Y2/1-416 |
| A0A0F7THL6/1-400 | A0A0F2SYL7/1-387 | A0A0E3TR57/1-270 | A0A0D8I4V0/1-305 |
| A0A0F7NHH7/1-487 | A0A0F2RMR0/1-303 | A0A0E3TQ83/1-327 | A0A0D8I3Z8/1-298 |
| A0A0F7N124/1-304 | A0A0F2QH58/1-441 | A0A0E3TP53/1-366 | A0A0D8I2X5/1-409 |
| A0A0F7MRY4/1-372 | A0A0F2QE00/1-290 | A0A0E3TN40/1-370 | A0A0D8HUS2/1-277 |
| A0A0F7HCA0/1-294 | A0A0F2GI08/1-424 | A0A0E3MP23/1-289 | A0A0D8HU43/1-301 |
| A0A0F7FU02/1-480 | A0A0F2GF99/1-351 | A0A0E3BM07/1-372 | A0A0D8HS83/1-298 |
| A0A0F7EST6/1-291 | A0A0F2GAK6/1-294 | A0A0E2YYY7/1-308 | A0A0D8HQH3/1-313 |
| A0A0F7CPC1/1-384 | A0A0F2G336/1-371 | A0A0E2XEP3/1-355 | A0A0D8HJR1/1-282 |
| A0A0F7BJB0/1-313 | A0A0F2G2M0/1-400 | A0A0E2X5X6/1-357 | A0A0D8FU16/1-265 |
| A0A0F7A982/1-288 | A0A0F2FWR2/1-299 | A0A0E2X493/1-357 | A0A0D8DR37/1-317 |
| A0A0F6YQG7/1-410 | A0A0F0IL58/1-467 | A0A0E2X2S3/1-271 | A0A0D8BFK7/1-297 |
| A0A0F6W891/1-317 | A0A0F0IK74/1-292 | A0A0E2WZV3/1-251 | A0A0D7QSU6/1-254 |
| A0A0F6W2M5/1-409 | A0A0F0I840/1-480 | A0A0E2WZK1/1-325 | A0A0D7QQ02/1-309 |
| A0A0F6LCH7/1-318 | A0A0F0HBT6/1-273 | A0A0E2WVN2/1-325 | A0A0D7PV06/1-317 |
| A0A0F6IC37/1-372 | A0A0F0H8Z2/1-287 | A0A0E2WTJ8/1-271 | A0A0D7F6N4/1-290 |
| A0A0F6I5P3/1-372 | A0A0F0H0C3/1-304 | A0A0E2WRU9/1-271 | A0A0D7F1W1/1-289 |
| A0A0F6H3F5/1-372 | A0A0F0GZN6/1-298 | A0A0E2WQH9/1-251 | A0A0D7E1H1/1-291 |
| A0A0F6GF59/1-318 | A0A0F0GYH8/1-296 | A0A0E2WQB4/1-334 | A0A0D7DES8/1-291 |
| A0A0F5Y522/1-291 | A0A0F0GV23/1-373 | A0A0E2WQ84/1-251 | A0A0D7DDG8/1-301 |
| A0A0F5VZZ0/1-269 | A0A0F0F6K6/1-289 | A0A0E2WPN6/1-355 | A0A0D7DAI2/1-299 |
| A0A0F5NGI4/1-439 | A0A0F0F4S0/1-324 | A0A0E2WNA4/1-321 | A0A0D7CX96/1-320 |
| A0A0F5NDX9/1-324 | A0A0F0EH77/1-316 | A0A0E2WLL7/1-317 | A0A0D7CWD1/1-391 |
| A0A0F5N7E7/1-274 | A0A0F0EFH7/1-289 | A0A0E2WLS5/1-334 | A0A0D7CPC9/1-298 |
| A0A0F5N4D7/1-307 | A0A0F0E9F9/1-298 | A0A0E2WK04/1-334 | A0A0D7CMX9/1-392 |
| A0A0F5N422/1-408 | A0A0F0DMG9/1-292 | A0A0E2WJB0/1-317 | A0A0D7CPL7/1-303 |
| A0A0F5N1V8/1-442 | A0A0E9ZFS6/1-289 | A0A0E2WF13/1-321 | A0A0D7CI92/1-275 |
| A0A0F5N0G4/1-262 | A0A0E9NRE9/1-467 | A0A0E2WDJ4/1-317 | A0A0D7CGZ7/1-293 |
| A0A0F5MZW5/1-442 | A0A0E9NQ63/1-378 | A0A0E2WD53/1-325 | A0A0D7CG19/1-314 |
| A0A0F5MZ63/1-269 | A0A0E9MYW8/1-257 | A0A0E2WBG4/1-355 | A0A0D6WZH1/1-488 |
| A0A0F5MYT7/1-372 | A0A0E9MMT4/1-289 | A0A0E2WBD8/1-357 | A0A0D6WLY9/1-301 |
| A0A0F5MYF0/1-284 | A0A0E9AKA0/1-496 | A0A0E2W6A2/1-321 | A0A0D6VJ57/1-489 |
| A0A0F5MY98/1-302 | A0A0E7ZQC2/1-360 | A0A0E2US79/1-288 | A0A0D6V4T5/1-300 |
| A0A0F5MY59/1-321 | A0A0E4HNG3/1-402 | A0A0E2IKU1/1-372 | A0A0D6UWN3/1-288 |
| A0A0F5MXS2/1-335 | A0A0E4H1B3/1-439 | A0A0E2GX57/1-404 | A0A0D6UV20/1-324 |
| A0A0F5MWM1/1-402 | A0A0E4GZA3/1-270 | A0A0E2GG39/1-404 | A0A0D6ULS8/1-297 |
| A0A0F5MW64/1-318 | A0A0E4GXR2/1-391 | A0A0E2G7Z9/1-372 | A0A0D6ULD4/1-320 |
| A0A0F5MUQ6/1-304 | A0A0E4GV91/1-302 | A0A0E2E469/1-372 | A0A0D6SY46/1-291 |
| A0A0F5MSW4/1-277 | A0A0E4FX2/1-316  | A0A0E2D362/1-372 | A0A0D6SR34/1-292 |
| A0A0F5K5G4/1-296 | A0A0E4CL89/1-322 | A0A0E2DOC1/1-372 | A0A0D6J3D1/1-299 |

AOA0D6J3C5/1-407  
 AOA0D6J3A9/1-462  
 AOA0D6J1F6/1-327  
 AOA0D6IFB3/1-345  
 AOA0D6ICM7/1-291  
 AOA0D6I9Q4/1-367  
 AOA0D6H612/1-334  
 AOA0D6GSQ2/1-289  
 AOA0D6GFN3/1-301  
 AOA0D6EP99/1-555  
 AOA0D6C708/1-288  
 AOA0D6BPB3/1-288  
 AOA0D5YME3/1-404  
 AOA0D5XUP2/1-288  
 AOA0D5P5D6/1-308  
 AOA0D5LCA0/1-318  
 AOA0D5ELY3/1-316  
 AOA0D5DWV7/1-318  
 AOA0D5CKV0/1-273  
 AOA0D5CGP0/1-332  
 AOA0D5AX13/1-298  
 AOA0D5AHF8/1-272  
 AOA0D5AHF3/1-298  
 AOA0D5AGH3/1-310  
 AOA0D5ADB6/1-323  
 AOA0D5ACH1/1-306  
 AOA0D4E1W7/1-408  
 AOA0D4DYV6/1-305  
 AOA0D4DGY9/1-503  
 AOA0D4DGC6/1-298  
 AOA0D4DGC3/1-291  
 AOA0D4C2I0/1-300  
 AOA0D4C1L8/1-404  
 AOA0D3LN52/1-254  
 AOA0D2Y4Q8/1-484  
 AOA0D2QA80/1-467  
 AOA0D2LF75/1-424  
 AOA0D2KU54/1-501  
 AOA0D2J3U7/1-253  
 AOA0D2IWX3/1-321  
 AOA0D2IDX8/1-492  
 AOA0D2HZI7/1-497  
 AOA0D2HKH5/1-411  
 AOA0D2HB02/1-410  
 AOA0D2GMT9/1-500  
 AOA0D2GHG0/1-403  
 AOA0D2GDV7/1-494  
 AOA0D2GCJ8/1-366  
 AOA0D2FJG8/1-477  
 AOA0D2E3R5/1-473  
 AOA0D2DU43/1-412  
 AOA0D2DSK2/1-480  
 AOA0D2CN81/1-494  
 AOA0D2BZW6/1-499  
 AOA0D2ASY6/1-291  
 AOA0D2AJ86/1-430  
 AOA0D2AB28/1-415  
 AOA0D1ZZK4/1-316  
 AOA0D1ZZD2/1-312  
 AOA0D1ZX84/1-337  
 AOA0D1ZUD2/1-475  
 AOA0D1ZJ06/1-439  
 AOA0D1YRY7/1-304  
 AOA0D1YB98/1-487  
 AOA0D1XZ43/1-425  
 AOA0D1XUV0/1-400  
 AOA0D1XUC6/1-474  
 AOA0D1XPZ4/1-310  
 AOA0D1XA66/1-480  
 AOA0D1WVE4/1-394  
 AOA0D1VVK6/1-472  
 AOA0D1PYJ3/1-254  
 AOA0D1M9C5/1-289  
 AOA0D1LSL0/1-448  
 AOA0D1LKW0/1-292  
 AOA0D1LH71/1-345  
 AOA0D1LC45/1-332  
 AOA0D1LB75/1-291  
 AOA0D1LAF8/1-301  
 AOA0D1L1D5/1-349  
 AOA0D1L0W3/1-446  
 AOA0D1JZM5/1-361  
 AOA0D1JY56/1-286  
 AOA0D1JWY4/1-412  
 AOA0D1JVM4/1-287  
 AOA0D1JT15/1-292  
 AOA0D1JT78/1-275  
 AOA0D1JMX5/1-315  
 AOA0D1JMD1/1-334  
 AOA0D1JBF0/1-319  
 AOA0D1J221/1-412  
 AOA0D1J1M9/1-406  
 AOA0D1CC20/1-512  
 AOA0D1C901/1-309  
 AOA0D1AKS5/1-281  
 AOA0D0X1K5/1-283  
 AOA0D0RL25/1-289  
 AOA0D0Q0L6/1-294  
 AOA0D0NBX8/1-466  
 AOA0D0MF40/1-318  
 AOA0D0LL52/1-295  
 AOA0D0LH55/1-290  
 AOA0D0LEC6/1-438  
 AOA0D0LBY6/1-414  
 AOA0D0LBT0/1-288  
 AOA0D0L9T8/1-305  
 AOA0D0L6N1/1-291  
 AOA0D0L2R4/1-286  
 AOA0D0JZZ8/1-291  
 AOA0D0JLF1/1-306  
 AOA0D0HCR9/1-316  
 AOA0D0CMU5/1-442  
 AOA0D0C2P6/1-503  
 AOA0D0BJM9/1-406  
 AOA0C9XRJ1/1-445  
 AOA0C9UVQ8/1-508  
 AOA0C9RWU7/1-338  
 AOA0C9RFI0/1-517  
 AOA0C9PRD0/1-293  
 AOA0C9MUQ9/1-274  
 AOA0C7KWC1/1-289  
 AOA0C7KJU9/1-289  
 AOA0C7DTP9/1-296  
 AOA0C7DS62/1-351  
 AOA0C7BT10/1-375  
 AOA0C5XNV6/1-281  
 AOA0C5XAP9/1-406  
 AOA0C5X646/1-372  
 AOA0C5V856/1-308  
 AOA0C5S187/1-289  
 AOA0C5K3N6/1-313  
 AOA0C5FY91/1-298  
 AOA0C5FX77/1-291  
 AOA0C5EFF9/1-288  
 AOA0C5BDC2/1-253  
 AOA0C4YJ13/1-280  
 AOA0C4WT82/1-315  
 AOA0C4WJ26/1-295  
 AOA0C3I1E7/1-331  
 AOA0C3HQQ0/1-385  
 AOA0C3HBC3/1-385  
 AOA0C3GS74/1-472  
 AOA0C3CXM3/1-446  
 AOA0C3CKY1/1-317  
 AOA0C3C5Z1/1-448  
 AOA0C3AFC8/1-298  
 AOA0C3ACH3/1-305  
 AOA0C3A3N0/1-278  
 AOA0C2ZY83/1-301  
 AOA0C2X7R6/1-400  
 AOA0C2VK23/1-291  
 AOA0C2RT27/1-290  
 AOA0C2NCT6/1-291  
 AOA0C2N6R0/1-290  
 AOA0C2MDP0/1-285  
 AOA0C2KNQ5/1-304  
 AOA0C2I853/1-290  
 AOA0C2G9W7/1-259  
 AOA0C2FLM9/1-308  
 AOA0C2CXV9/1-389  
 AOA0C2BZM1/1-304  
 AOA0C2B5C3/1-309  
 AOA0C2ASW0/1-477  
 AOA0C1ZY4/1-330  
 AOA0C1XW11/1-285  
 AOA0C1XUM1/1-487  
 AOA0C1WVT2/1-312  
 AOA0C1VP50/1-317  
 AOA0C1TZT3/1-257  
 AOA0C1SLB9/1-304  
 AOA0C1SLB8/1-291  
 AOA0C1SC33/1-464  
 AOA0C1S4K1/1-250  
 AOA0C1R9K8/1-300  
 AOA0C1NV10/1-414  
 AOA0C1NR38/1-326  
 AOA0C1MVB2/1-287  
 AOA0C1LCG9/1-251  
 AOA0C1I8H5/1-289  
 AOA0C1DYY1/1-303  
 AOA0C1DNK6/1-284  
 AOA0C1DFC7/1-302  
 AOA0C1D8X8/1-445  
 AOA0C1D752/1-319  
 AOA0C1D2L6/1-398  
 AOA0C1CS59/1-416  
 AOA0C1BJ46/1-263  
 AOA0C1B8I2/1-302  
 AOA0C1B5W2/1-301  
 AOA0C1B575/1-310  
 AOA0C1B3A2/1-288  
 AOA0C1B2I5/1-413  
 AOA0B9X958/1-404  
 AOA0B8Z8K6/1-320  
 AOA0B8XP71/1-318  
 AOA0B8NRJ3/1-280  
 AOA0B8NQ5/1-314  
 AOA0B8NQ05/1-446  
 AOA0B8NPS2/1-314  
 AOA0B8NLZ6/1-287  
 AOA0B8NLZ2/1-313  
 AOA0B8NLW7/1-324  
 AOA0B8NKX3/1-275  
 AOA0B8NGU8/1-287  
 AOA0B8NGD8/1-303  
 AOA0B8ND80/1-339  
 AOA0B8NCN4/1-345  
 AOA0B8NCE6/1-284  
 AOA0B8NB5/1-366  
 AOA0B8N0P0/1-317  
 AOA0B8N0F8/1-441  
 AOA0B7K8V3/1-442  
 AOA0B7K298/1-507  
 AOA0B7JNJ8/1-459  
 AOA0B7JKL1/1-427  
 AOA0B7G511/1-289  
 AOA0B7FP19/1-519  
 AOA0B7FAD1/1-381  
 AOA0B7DG33/1-290  
 AOA0B6RIC6/1-365  
 AOA0B5LB52/1-423  
 AOA0B5IHS8/1-278  
 AOA0B5IGM0/1-291  
 AOA0B5IF08/1-387  
 AOA0B51V5/1-306  
 AOA0B5I0G9/1-297  
 AOA0B5F855/1-289  
 AOA0B5EXQ5/1-368  
 AOA0B5EF93/1-282  
 AOA0B5DUN5/1-304  
 AOA0B5CSY1/1-291  
 AOA0B4XR90/1-396  
 AOA0B4XNA9/1-380  
 AOA0B4HY68/1-299  
 AOA0B4H0M0/1-362  
 AOA0B4GGV6/1-298  
 AOA0B4GE15/1-429  
 AOA0B4FMP7/1-298  
 AOA0B4FBR7/1-428  
 AOA0B4EUS5/1-429  
 AOA0B4ETF8/1-299  
 AOA0B4DFL7/1-398  
 AOA0B4D8U6/1-311  
 AOA0B4D6S8/1-272  
 AOA0B3SW56/1-328  
 AOA0B3C092/1-292  
 AOA0B2YXX3/1-314  
 AOA0B2YW23/1-300  
 AOA0B2YV95/1-289  
 AOA0B2YRP3/1-361  
 AOA0B2YR18/1-301  
 AOA0B2YP50/1-356  
 AOA0B2YNI8/1-291  
 AOA0B2YNH0/1-336  
 AOA0B2YLP7/1-300  
 AOA0B2YLL0/1-314  
 AOA0B2YL03/1-348  
 AOA0B2YJK4/1-404  
 AOA0B2YID1/1-289  
 AOA0B2YGR9/1-336  
 AOA0B2YEL4/1-275  
 AOA0B2YCL2/1-301  
 AOA0B2YC59/1-348  
 AOA0B2YB5/1-336  
 AOA0B2Y9Z0/1-404  
 AOA0B2Y9T4/1-291  
 AOA0B2Y9L6/1-361  
 AOA0B2Y8Z7/1-340  
 AOA0B2Y788/1-356  
 AOA0B2Y577/1-275  
 AOA0B2XVC1/1-404  
 AOA0B2XQG9/1-336  
 AOA0B2X001/1-331  
 AOA0B2WX66/1-296  
 AOA0B2UDR3/1-403  
 AOA0B2UA63/1-404  
 AOA0B2NPZ4/1-306  
 AOA0B2D456/1-292  
 AOA0B2BX88/1-283  
 AOA0B2BLP6/1-413  
 AOA0B2BLL5/1-406  
 AOA0B2BEB2/1-409  
 AOA0B2B978/1-317  
 AOA0B2B5G0/1-264  
 AOA0B2AYV1/1-402  
 AOA0B2AXS8/1-279  
 AOA0B2AIX0/1-304  
 AOA0B2A1B6/1-285  
 AOA0B1ZWY8/1-301  
 AOA0B1YCJ3/1-317  
 AOA0B1YBN0/1-298  
 AOA0B1RI25/1-285

AOA0B1RHT0/1-391  
 AOA0B1RGZ3/1-408  
 AOA0B1RFI5/1-276  
 AOA0B1RFB3/1-321  
 AOA0B1R4D2/1-287  
 AOA0B0BKL5/1-402  
 AOA0B0E3Y4/1-462  
 AOA0B0DJG3/1-442  
 AOA0A9YJB6/1-335  
 AOA0A9XA16/1-412  
 AOA0A8XLE2/1-404  
 AOA0A8TMQ7/1-403  
 AOA0A8F032/1-381  
 AOA0A8EY21/1-479  
 AOA0A8EW16/1-305  
 AOA0A8EKN2/1-308  
 AOA0A8EK88/1-305  
 AOA0A8EFM5/1-293  
 AOA0A8EEI0/1-296  
 AOA0A8EA16/1-388  
 AOA0A8E612/1-309  
 AOA0A8C154/1-313  
 AOA0A7PWA9/1-289  
 AOA0A7PCC4/1-442  
 AOA0A7JGK2/1-289  
 AOA0A6VYC3/1-296  
 AOA0A6USF5/1-271  
 AOA0A6URA1/1-404  
 AOA0A6UPE7/1-390  
 AOA0A6UKH6/1-386  
 AOA0A6UHR9/1-305  
 AOA0A6UC14/1-284  
 AOA0A6UBY3/1-404  
 AOA0A6U3Y1/1-308  
 AOA0A6QCH4/1-314  
 AOA0A6D4Z0/1-290  
 AOA0A4FHY9/1-308  
 AOA0A3Z4F9/1-287  
 AOA0A3YVT5/1-291  
 AOA0A3XXD1/1-316  
 AOA0A3JFK3/1-342  
 AOA0A3JF04/1-317  
 AOA0A3FNA7/1-308  
 AOA0A2WC27/1-301  
 AOA0A2VRH0/1-451  
 AOA0A2N905/1-291  
 AOA0A2MNM0/1-251  
 AOA0A2KCCQ6/1-466  
 AOA0A2KOT9/1-363  
 AOA0A2JSH7/1-303  
 AOA0A2IT18/1-420  
 AOA0A1Z6S9/1-289  
 AOA0A1W6B1/1-274  
 AOA0A1UV39/1-429  
 AOA0A1T8D1/1-297  
 AOA0A1RXA1/1-398  
 AOA0A1PJ57/1-397  
 AOA0A1GM18/1-291  
 AOA0A1FZI2/1-289  
 AOA0A1FZ55/1-347  
 AOA0A1FWE3/1-360  
 AOA0A1FVH3/1-340  
 AOA0A1FU5/1-301  
 AOA0A1FT57/1-404  
 AOA0A1FRV5/1-317  
 AOA0A1FQU1/1-288  
 AOA0A1FNM8/1-332  
 AOA0A1FN87/1-348  
 AOA0A1FM25/1-300  
 AOA0A1FLU0/1-309  
 AOA0A1FKM7/1-326  
 AOA0A1FHY1/1-361  
 AOA0A1F2I0/1-402  
 AOA0A1DZWZ3/1-270  
 AOA0A1DVL4/1-363  
 AOA0A1DUD8/1-311  
 AOA0A1DPV6/1-416  
 AOA0A1DIT5/1-295  
 AOA0A1DFL2/1-283  
 AOA0A1D5E1/1-297  
 AOA0A1CXZ3/1-258  
 AOA0A1CU38/1-279  
 AOA0A1CTX8/1-307  
 AOA0A1B1Y0/1-290  
 AOA0A0Z3H1/1-292  
 AOA0A0NU59/1-316  
 AOA0A0NSC9/1-485  
 AOA0A0NCR4/1-286  
 AOA0A0K0D7/1-306  
 AOA0A0J3H2/1-302  
 AOA0A0J2E9/1-311  
 AOA0A0J1H5/1-403  
 AOA0A0IZE2/1-446  
 AOA0A0DSB2/1-358  
 AOA0A0C7G6/1-302  
 AOA0A0BPV3/1-309  
 AOA0A0BNA3/1-308  
 AOA0A0BMD6/1-285  
 AOA0A0B5V6/1-292  
 AOA0A0B3B1/1-282  
 AOA0A095Q58/1-288  
 AOA0A099Q3U2/1-308  
 AOA0A099N6L3/1-289  
 AOA0A099JB10/1-319  
 AOA0A099IT31/1-316  
 AOA0A099DZ36/1-289  
 AOA0A099D1P5/1-294  
 AOA0A099CNH2/1-335  
 AOA0A099CKU4/1-345  
 AOA0A099CGZ0/1-329  
 AOA0A099CGN4/1-286  
 AOA0A099CGD8/1-290  
 AOA0A099CDI4/1-285  
 AOA0A099CCT6/1-281  
 AOA0A098Y1G0/1-290  
 AOA0A098U384/1-456  
 AOA0A098PZ55/1-308  
 AOA0A098MT31/1-372  
 AOA0A098LH12/1-292  
 AOA0A098FYM7/1-291  
 AOA0A098DNZ3/1-463  
 AOA0A098BRW3/1-413  
 AOA0A098BQB0/1-327  
 AOA0A098BGM8/1-308  
 AOA0A098BF12/1-285  
 AOA0A097EJP2/1-286  
 AOA0A096YRC7/1-317  
 AOA0A095WE59/1-334  
 AOA0A095UQ17/1-329  
 AOA0A095UKX3/1-294  
 AOA0A095UI42/1-415  
 AOA0A095UG28/1-305  
 AOA0A095TVR3/1-453  
 AOA0A095TSI5/1-416  
 AOA0A095TKS2/1-314  
 AOA0A095TKF7/1-380  
 AOA0A095TCM0/1-446  
 AOA0A095T9T7/1-291  
 AOA0A095SNX6/1-297  
 AOA0A095SN86/1-551  
 AOA0A095SMR6/1-294  
 AOA0A095SMM8/1-380  
 AOA0A095SJH8/1-408  
 AOA0A095SAA9/1-547  
 AOA0A095S6S4/1-412  
 AOA0A095MFJ9/1-318  
 AOA095HUT5/1-334  
 AOA095F444/1-317  
 AOA095DWF5/1-317  
 AOA095C5M1/1-299  
 AOA095AUP3/1-298  
 AOA095AR08/1-442  
 AOA095APL1/1-442  
 AOA094SMC9/1-262  
 AOA094SC91/1-310  
 AOA094RV80/1-285  
 AOA094RTA7/1-290  
 AOA094R305/1-308  
 AOA094Q982/1-264  
 AOA094Q7G9/1-291  
 AOA094PVS4/1-291  
 AOA094PTH7/1-270  
 AOA094PJA6/1-306  
 AOA094PAP2/1-306  
 AOA094MEW9/1-283  
 AOA094MEN1/1-283  
 AOA094MAV6/1-401  
 AOA094M0L8/1-396  
 AOA094HS33/1-320  
 AOA094HJB0/1-447  
 AOA094HGN4/1-326  
 AOA094HG76/1-326  
 AOA094GYJ6/1-430  
 AOA094GNQ6/1-436  
 AOA094GFJ6/1-428  
 AOA094FZV1/1-465  
 AOA094FQW6/1-326  
 AOA094FNF1/1-314  
 AOA094FKY3/1-447  
 AOA094FKW2/1-447  
 AOA094FFI3/1-465  
 AOA094EVK2/1-449  
 AOA094EVG2/1-326  
 AOA094EES8/1-430  
 AOA094ECU8/1-317  
 AOA094E3I5/1-277  
 AOA094E2Y5/1-314  
 AOA094DTC2/1-585  
 AOA094D7S8/1-463  
 AOA094CZ60/1-337  
 AOA094CSQ9/1-447  
 AOA094CRB8/1-317  
 AOA094CJB1/1-317  
 AOA094CGF3/1-476  
 AOA094CAK8/1-449  
 AOA094CA94/1-316  
 AOA094C1G3/1-448  
 AOA094BVD6/1-448  
 AOA094BE47/1-461  
 AOA094AMD8/1-447  
 AOA094AFC9/1-449  
 AOA094A5V6/1-449  
 AOA094A549/1-314  
 AOA094A4W7/1-317  
 AOA094A3C9/1-424  
 AOA093ZSG4/1-462  
 AOA093ZH65/1-461  
 AOA093ZH19/1-431  
 AOA093ZDE5/1-326  
 AOA093YG66/1-275  
 AOA093XXJ1/1-275  
 AOA093XV72/1-317  
 AOA093XMV3/1-476  
 AOA093VE00/1-330  
 AOA093V9R7/1-384  
 AOA093D609/1-284  
 AOA093D3L1/1-401  
 AOA093BGL4/1-306  
 AOA093BBD1/1-396  
 AOA093B4P8/1-383  
 AOA093B206/1-279  
 AOA091B349/1-303  
 AOA090FEV1/1-345  
 AOA090CNI3/1-484  
 AOA089YR91/1-503  
 AOA089X1K8/1-298  
 AOA089X0B7/1-294  
 AOA089UJ95/1-461  
 AOA089UH74/1-460  
 AOA089UFQ5/1-312  
 AOA089T6R0/1-303  
 AOA089T493/1-316  
 AOA089T2K9/1-338  
 AOA089T243/1-369  
 AOA089T1K9/1-381  
 AOA089T1H2/1-333  
 AOA089T022/1-449  
 AOA089S2J3/1-407  
 AOA089SXU7/1-309  
 AOA089S7J3/1-271  
 AOA089S3C4/1-351  
 AOA088X6J2/1-398  
 AOA088X0X5/1-317  
 AOA088UWJ0/1-317  
 AOA088UC24/1-313  
 AOA088TKX6/1-317  
 AOA088NQB6/1-289  
 AOA088EZY5/1-400  
 AOA088ATH0/1-339  
 AOA087ZTC2/1-361  
 AOA087USY7/1-331  
 AOA087SXBO/1-333  
 AOA087NPR9/1-317  
 AOA087L727/1-291  
 AOA087K6E0/1-326  
 AOA087K481/1-288  
 AOA087K198/1-297  
 AOA087K174/1-320  
 AOA087JYP2/1-301  
 AOA087JYM2/1-423  
 AOA087F5J9/1-290  
 AOA086WCP0/1-455  
 AOA086W612/1-288  
 AOA086THT5/1-433  
 AOA086TDT0/1-471  
 AOA086TD97/1-305  
 AOA086TBJ3/1-479  
 AOA086T536/1-301  
 AOA086T2P9/1-373  
 AOA086NEN4/1-299  
 AOA086NB26/1-429  
 AOA086N8E0/1-491  
 AOA086N7F5/1-289  
 AOA086N6P5/1-298  
 AOA086MSR2/1-284  
 AOA086H3U5/1-353  
 AOA086H0D5/1-288  
 AOA086G4A6/1-290  
 AOA086E2B5/1-305  
 AOA086D4C2/1-300  
 AOA086D1R1/1-361  
 AOA086BT72/1-293  
 AOA086B533/1-395  
 AOA086B212/1-395  
 AOA086A0Q1/1-398  
 AOA085ZWG4/1-398  
 AOA085Z4V5/1-398  
 AOA085VRN7/1-288  
 AOA085UMN7/1-288  
 AOA085JC61/1-294  
 AOA085IE08/1-289  
 AOA085HT34/1-290

|                  |                   |                  |                  |
|------------------|-------------------|------------------|------------------|
| A0A085FGW2/1-288 | A0A076EEP3/1-319  | A0A066TXA5/1-289 | A0A059LAB6/1-288 |
| A0A085BHF7/1-398 | A0A076E2C2/1-341  | A0A066TX87/1-397 | A0A059KD36/1-419 |
| A0A085BGE9/1-398 | A0A076E0D6/1-271  | A0A066TSD8/1-385 | A0A059K8R4/1-450 |
| A0A084YNW7/1-290 | A0A076CX96/1-351  | A0A066TR43/1-326 | A0A059JW1/1-419  |
| A0A084WJM8/1-468 | A0A075V9N5/1-400  | A0A066RWQ6/1-271 | A0A059IXM8/1-450 |
| A0A084W2A5/1-362 | A0A075V796/1-283  | A0A066PKM0/1-276 | A0A059IDM6/1-290 |
| A0A084SUL3/1-292 | A0A075U203/1-396  | A0A064CP13/1-291 | A0A059GB93/1-444 |
| A0A084STV6/1-379 | A0A075UX79/1-306  | A0A064CN91/1-299 | A0A059G5S2/1-306 |
| A0A084RF2/1-495  | A0A075USY3/1-283  | A0A064CN20/1-340 | A0A059FXR2/1-307 |
| A0A084R3B0/1-442 | A0A075USE4/1-406  | A0A064CMB0/1-271 | A0A059FHU5/1-306 |
| A0A084QYJ2/1-370 | A0A075PGA0/1-289  | A0A064CM21/1-462 | A0A059FEL9/1-441 |
| A0A084QXG6/1-495 | A0A075K4G5/1-307  | A0A064CJ85/1-287 | A0A059F6I6/1-306 |
| A0A084PJH9/1-495 | A0A075JIV1/1-320  | A0A064CHK9/1-343 | A0A059ED20/1-440 |
| A0A084PC73/1-442 | A0A074Z280/1-483  | A0A064BTD9/1-309 | A0A059E7Z1/1-422 |
| A0A084IPH3/1-311 | A0A074XDQ2/1-485  | A0A064BE53/1-292 | A0A059E2G8/1-440 |
| A0A084EIG5/1-302 | A0A074WJ04/1-483  | A0A064BBA6/1-467 | A0A059DN78/1-305 |
| A0A084DLE3/1-317 | A0A074VQH6/1-484  | A0A064BAM9/1-267 | A0A059DLT1/1-461 |
| A0A084C7A7/1-289 | A0A074UHF6/1-310  | A0A064AYA8/1-286 | A0A058Z7V2/1-304 |
| A0A084BXJ9/1-292 | A0A074T1A7/1-515  | A0A064AUR1/1-449 | A0A051UH40/1-316 |
| A0A084BM93/1-456 | A0A074RU71/1-407  | A0A064ARU6/1-305 | A0A051UGH8/1-302 |
| A0A084BJ13/1-290 | A0A074NOG1/1-277  | A0A063CAW9/1-412 | A0A051U5X3/1-334 |
| A0A084AZH5/1-495 | A0A074MBK4/1-286  | A0A063BNQ6/1-317 | A0A051U1D3/1-359 |
| A0A083WS53/1-399 | A0A074M4Q0/1-279  | A0A062VQ22/1-446 | A0A051U0A0/1-321 |
| A0A083WIN3/1-306 | A0A074L0D5/1-368  | A0A062VMQ5/1-287 | A0A051TYG1/1-305 |
| A0A083WBI8/1-351 | A0A073B3F3/1-258  | A0A062VBL4/1-307 | A0A051TV99/1-271 |
| A0A083UT38/1-289 | A0A072SN15/1-485  | A0A062US42/1-306 | A0A051TS67/1-354 |
| A0A081YDH5/1-292 | A0A072SM86/1-289  | A0A062UG17/1-444 | A0A049ECL5/1-271 |
| A0A081XQK4/1-293 | A0A072S6N0/1-468  | A0A062UE45/1-441 | A0A049DW54/1-357 |
| A0A081XK26/1-290 | A0A072S6L3/1-306  | A0A062U8G2/1-441 | A0A049DS35/1-317 |
| A0A081W362/1-308 | A0A072S6F6/1-409  | A0A062TZ65/1-294 | A0A049DNE7/1-314 |
| A0A081UZY3/1-317 | A0A072PET6/1-479  | A0A062TVC7/1-295 | A0A049DKN9/1-334 |
| A0A081R9X8/1-380 | A0A072CSQ6/1-402  | A0A062SM71/1-402 | A0A049D9R0/1-355 |
| A0A081I783/1-334 | A0A071MFG3/1-317  | A0A062MPS9/1-402 | A0A049D562/1-369 |
| A0A081I4S6/1-324 | A0A070SC16/1-283  | A0A062M253/1-404 | A0A049D2R5/1-325 |
| A0A081I413/1-302 | A0A070HJA9/1-283  | A0A062L6G8/1-404 | A0A045KBU2/1-351 |
| A0A081I261/1-350 | A0A069Q2D6/1-293  | A0A062IL57/1-402 | A0A045JWK5/1-306 |
| A0A081HWV4/1-327 | A0A069PFT0/1-299  | A0A062IHJ4/1-404 | A0A045HJX5/1-351 |
| A0A081HWV3/1-296 | A0A069KKBK3/1-301 | A0A062GVX0/1-404 | A0A038CV17/1-289 |
| A0A081HVA7/1-355 | A0A069K9Z0/1-304  | A0A062GHJ2/1-402 | A0A037UZ79/1-318 |
| A0A081GK86/1-294 | A0A069K1E5/1-292  | A0A062G3V1/1-404 | A0A034VU34/1-379 |
| A0A081FWV3/1-324 | A0A069JIS17/1-298 | A0A062FNF9/1-404 | A0A034UMZ3/1-319 |
| A0A081ENT2/1-297 | A0A069JQT3/1-270  | A0A062FDY0/1-404 | A0A034UMX0/1-319 |
| A0A081EGZ9/1-433 | A0A069JMF6/1-310  | A0A062EQZ5/1-404 | A0A034UMC2/1-416 |
| A0A081EBF3/1-314 | A0A069JKZ3/1-295  | A0A062DT04/1-404 | A0A034ULU0/1-404 |
| A0A081CTM5/1-440 | A0A069JJO1/1-301  | A0A062D905/1-404 | A0A034UIW5/1-318 |
| A0A081BA21/1-311 | A0A069JE48/1-313  | A0A062A1X1/1-404 | A0A034UBT1/1-302 |
| A0A080M8S5/1-275 | A0A069J9P5/1-297  | A0A061YW54/1-308 | A0A034U9Y9/1-295 |
| A0A078MHU4/1-304 | A0A069E9A1/1-454  | A0A061LXF9/1-319 | A0A034U8C6/1-445 |
| A0A078MG16/1-282 | A0A069E7U8/1-306  | A0A061JLS3/1-291 | A0A034U745/1-301 |
| A0A078LUG5/1-294 | A0A069B4K5/1-318  | A0A061H1Z4/1-407 | A0A034U441/1-339 |
| A0A077XX15/1-400 | A0A068RRC5/1-349  | A0A061CNZ9/1-290 | A0A034U1U9/1-284 |
| A0A077SFA2/1-289 | A0A068RQS8/1-368  | A0A061ARQ9/1-545 | A0A034TZL5/1-290 |
| A0A077R1X0/1-460 | A0A068HBE7/1-289  | A0A061AA25/1-257 | A0A031LJ55/1-402 |
| A0A077LFD0/1-289 | A0A067TKT5/1-499  | A0A061A9U4/1-323 | A0A031FW5/1-322  |
| A0A077L441/1-402 | A0A067T351/1-505  | A0A061A186/1-485 | A0A031J848/1-289 |
| A0A077KQC5/1-394 | A0A067SSB4/1-369  | A0A060ZQN9/1-286 | A0A03111U6/1-286 |
| A0A077HLD0/1-358 | A0A067SNU7/1-406  | A0A060V1H5/1-289 | A0A031HW73/1-290 |
| A0A077HJF3/1-459 | A0A067R687/1-595  | A0A060JEJ6/1-326 | A0A031H644/1-309 |
| A0A077HJ39/1-297 | A0A067QHU4/1-321  | A0A059ZQV4/1-301 | A0A031GES7/1-290 |
| A0A077F9C3/1-289 | A0A067PSV2/1-422  | A0A059ZKR9/1-404 | A0A031GEL4/1-290 |
| A0A076NQA3/1-399 | A0A067P6C1/1-401  | A0A059WJA2/1-478 | A0A031G169/1-290 |
| A0A076NLI5/1-436 | A0A067N721/1-395  | A0A059WHP0/1-305 | A0A031FT35/1-292 |
| A0A076NK24/1-305 | A0A067MH68/1-394  | A0A059WHD2/1-305 | A0A028VAM3/1-290 |
| A0A076N9W1/1-405 | A0A067LME2/1-259  | A0A059WH80/1-296 | A0A028JW68/1-450 |
| A0A076MWD7/1-307 | A0A067LIU8/1-325  | A0A059WH76/1-293 | A0A026WNV6/1-388 |
| A0A076MUD7/1-272 | A0A067A4L6/1-289  | A0A059W338/1-304 | A0A026WML0/1-379 |
| A0A076MTW2/1-295 | A0A066YN67/1-283  | A0A059VZA0/1-388 | A0A026WKF5/1-338 |
| A0A076HL55/1-288 | A0A066YI39/1-285  | A0A059V266/1-289 | A0A026WJA4/1-264 |
| A0A076ES36/1-410 | A0A066YI26/1-466  | A0A059ML34/1-273 | A0A026WBV7/1-284 |
| A0A076EMP1/1-301 | A0A066Y2I9/1-471  | A0A059MKH0/1-310 | A0A024YXH3/1-395 |
| A0A076EKD4/1-274 | A0A066Y2I2/1-300  | A0A059MJ37/1-276 | A0A024YXA7/1-300 |
| A0A076EIL6/1-310 | A0A066XUJ9/1-464  | A0A059MGH1/1-413 | A0A024YV78/1-271 |
| A0A076E172/1-437 | A0A066TZB6/1-393  | A0A059MG93/1-336 | A0A024YUS2/1-304 |

|                   |                  |                  |                  |
|-------------------|------------------|------------------|------------------|
| A0A024YP78/1-307  | A0A023Y7Y8/1-307 | A0A022L7F8/1-303 | A0A013M5V5/1-404 |
| A0A024SCY6/1-453  | A0A023XJQ8/1-308 | A0A022KJ99/1-404 | A0A013JNS5/1-404 |
| A0A024SA94/1-424  | A0A023WVG2/1-291 | A0A022IPH2/1-408 | A0A011P4U9/1-296 |
| A0A024QY62/1-327  | A0A023NNN7/1-313 | A0A022IE52/1-402 | A0A011MSU8/1-303 |
| A0A024QXJ3/1-318  | A0A023EUG4/1-437 | A0A022I9F8/1-402 | A0A011JSQ3/1-404 |
| A0A024QTS1/1-289  | A0A023EPG7/1-360 | A0A022FX4/1-318  | A0A01026T3/1-326 |
| A0A024QSQ5/1-321  | A0A023CIK3/1-289 | A0A021VRR4/1-315 | A0A010UM68/1-404 |
| A0A024QMT6/1-294  | A0A023AST6/1-419 | A0A017T642/1-409 | A0A010SX44/1-290 |
| A0A024QMQ27/1-291 | A0A023ANG2/1-450 | A0A017SVH1/1-447 | A0A010S3T6/1-472 |
| A0A024QKJ5/1-404  | A0A022ZY47/1-419 | A0A017SGD2/1-420 | A0A010QV24/1-511 |
| A0A024M948/1-340  | A0A022ZRS2/1-450 | A0A017S3R7/1-421 | A0A010QQJ5/1-404 |
| A0A024M6P0/1-275  | A0A022ZOY5/1-419 | A0A017S3P3/1-299 | A0A010M4V8/1-404 |
| A0A024M5W9/1-319  | A0A022YWN5/1-450 | A0A017H9T4/1-293 | A0A010L142/1-404 |
| A0A024M469/1-326  | A0A022Y5T8/1-419 | A0A016PXF9/1-463 | A0A010KZL8/1-404 |
| A0A024M3C2/1-357  | A0A022Y257/1-450 | A0A016PRR0/1-433 | A0A010J7V6/1-404 |
| A0A024M1S4/1-314  | A0A022XA13/1-419 | A0A016PNG1/1-458 | A0A010H6H4/1-404 |
| A0A024M0R9/1-300  | A0A022X6C6/1-450 | A0A014NES8/1-299 | A0A010G1B5/1-404 |
| A0A024LZ38/1-332  | A0A022WEPO/1-419 | A0A014MSE8/1-316 | A0A009ZMH1/1-401 |
| A0A024LYQ9/1-284  | A0A022WB92/1-450 | A0A014L1E9/1-286 | A0A009S0P3/1-404 |
| A0A024LYJ2/1-301  | A0A022VK15/1-419 | A0A014E800/1-402 | A0A009R9T2/1-404 |
| A0A024LU56/1-288  | A0A022VFD4/1-450 | A0A014DME8/1-402 | A0A009QKW2/1-404 |
| A0A024LTX0/1-404  | A0A022UMH7/1-419 | A0A014CG19/1-402 | A0A009PBA1/1-406 |
| A0A024K4A3/1-360  | A0A022UJP0/1-450 | A0A014C2M7/1-402 | A0A009MGU5/1-404 |
| A0A024K1H5/1-270  | A0A022U029/1-419 | A0A014BXY6/1-402 | A0A009LVS1/1-408 |
| A0A024K091/1-369  | A0A022TVX8/1-450 | A0A014BGT3/1-402 | A0A009L116/1-402 |
| A0A024JXE0/1-343  | A0A022SSN4/1-372 | A0A014BD98/1-402 | A0A009KKR8/1-402 |
| A0A024JX98/1-391  | A0A022MC72/1-302 | A0A014AN09/1-402 | A0A009K7Q0/1-402 |
| A0A024JSW7/1-316  | A0A022LSF5/1-335 | A0A013UQ12/1-402 | A0A009I2R8/1-404 |
| A0A024JSH1/1-302  | A0A022LNU1/1-289 | A0A013U245/1-404 | A0A009HYP7/1-300 |
| A0A024HNN3/1-292  | A0A022LMV2/1-409 | A0A013TOL9/1-404 | A0A009GVQ4/1-404 |
| A0A024H776/1-308  | A0A022LIJ1/1-290 | A0A013SL55/1-404 | A0A009GB05/1-402 |
| A0A024GY94/1-272  | A0A022LB97/1-274 | A0A013RM47/1-404 | A0A009FXS5/1-404 |

#### 495 sequences homologue to Lcp<sub>K30</sub> used for Figure 1

LcpK30/1-407  
 LcpRr/1-408  
 LcpVH2/1-407  
 gi|1001207926|gb|KXO95042.1|/1-409  
 gi|1001209655|gb|KXO96733.1|/1-418  
 gi|1001212592|gb|KXO99636.1|/1-353  
 gi|1001217188|gb|KXP04156.1|/1-353  
 gi|1001225646|gb|KXP12521.1|/1-415  
 gi|1002996378|ref|WP\_061440650.1|/1-386  
 gi|1011024729|ref|WP\_061981012.1|/1-387  
 gi|1011031315|ref|WP\_061987588.1|/1-399  
 gi|1011124826|ref|WP\_062046683.1|/1-384  
 gi|1011656815|ref|WP\_062505992.1|/1-417  
 gi|1011831196|ref|WP\_062650159.1|/1-401  
 gi|1011831775|ref|WP\_062650738.1|/1-407  
 gi|1011963691|ref|WP\_062770100.1|/1-387  
 gi|1011997432|ref|WP\_062795088.1|/1-407  
 gi|1016278947|ref|WP\_062963305.1|/1-407  
 gi|1016293073|ref|WP\_062977206.1|/1-414  
 gi|1016308244|ref|WP\_062980248.1|/1-416  
 gi|1016310210|ref|WP\_062981848.1|/1-413  
 gi|1016310488|ref|WP\_062982080.1|/1-413  
 gi|1016325893|ref|WP\_062996681.1|/1-413  
 gi|1016331483|ref|WP\_063001876.1|/1-407  
 gi|1016333737|ref|WP\_063003752.1|/1-413  
 gi|1016333822|ref|WP\_063003837.1|/1-413  
 gi|1016342323|ref|WP\_063012276.1|/1-407  
 gi|1016347704|ref|WP\_063017553.1|/1-407  
 gi|1016353625|ref|WP\_063023207.1|/1-407  
 gi|1016353920|ref|WP\_063023502.1|/1-413  
 gi|1016364826|ref|WP\_063034184.1|/1-413  
 gi|1016383054|ref|WP\_063051239.1|/1-414  
 gi|1016417186|ref|WP\_063056674.1|/1-413  
 gi|1016418827|ref|WP\_063058203.1|/1-413  
 gi|157734202|gb|ABV68924.1|/1-407  
 gi|170180374|gb|ABV68923.1|/1-407  
 gi|306756318|sp|Q3L8N0.2|/1-407  
 gi|320012208|gb|ADW07058.1|/1-408  
 gi|326197583|gb|EGD54772.1|/1-404  
 gi|340545041|dbj|BAK52801.1|/1-407  
 gi|358243017|dbj|GAB11151.1|/1-353  
 gi|365817994|gb|EHN12936.1|/1-389  
 gi|374846398|emb|CCF63468.1|/1-404  
 gi|375755257|gb|AFA76036.1|/1-388  
 gi|387846498|emb|CCH52581.1|/1-376  
 gi|403206604|dbj|GAB89391.1|/1-345  
 gi|407307034|gb|AFU00935.1|/1-404  
 gi|443889260|dbj|GAC67155.1|/1-399  
 gi|446890110|ref|WP\_000967366.1|/1-377  
 gi|455650289|gb|EMF29072.1|/1-397  
 gi|478744316|gb|AGJ52896.1|/1-361  
 gi|486081790|gb|EOD64895.1|/1-374  
 gi|488788336|ref|WP\_002700743.1|/1-368  
 gi|490019951|ref|WP\_003922454.1|/1-373  
 gi|490055025|ref|WP\_003957330.1|/1-404  
 gi|490069076|ref|WP\_003971251.1|/1-394  
 gi|490070043|ref|WP\_003972218.1|/1-401  
 gi|490076123|ref|WP\_003978298.1|/1-386  
 gi|490119608|ref|WP\_004020123.1|/1-407  
 gi|491074837|ref|WP\_004936459.1|/1-399  
 gi|491309277|ref|WP\_005167261.1|/1-399  
 gi|491326241|ref|WP\_005184204.1|/1-408  
 gi|491342946|ref|WP\_005200885.1|/1-407  
 gi|491450158|ref|WP\_005307945.1|/1-386  
 gi|493115572|ref|WP\_006144271.1|/1-386  
 gi|493392537|ref|WP\_006348693.1|/1-388  
 gi|493412800|ref|WP\_006368739.1|/1-407  
 gi|493426072|ref|WP\_006381778.1|/1-387  
 gi|493481229|ref|WP\_006436107.1|/1-407  
 gi|493588158|ref|WP\_006541094.1|/1-400  
 gi|493589923|ref|WP\_006542830.1|/1-408  
 gi|493923362|ref|WP\_006868302.1|/1-407  
 gi|493955090|ref|WP\_006898821.1|/1-407  
 gi|494081186|ref|WP\_007023226.1|/1-411

gi|494081187|ref|WP\_007023227.1|/1-406  
gi|494089278|ref|WP\_007030113.1|/1-396  
gi|494530041|ref|WP\_007319492.1|/1-410  
gi|494621449|ref|WP\_007373939.1|/1-386  
gi|494771430|ref|WP\_007506838.1|/1-403  
gi|494801026|ref|WP\_007536434.1|/1-410  
gi|495656149|ref|WP\_008380728.1|/1-404  
gi|496364252|ref|WP\_009073242.1|/1-403  
gi|496443941|ref|WP\_009152786.1|/1-404  
gi|496447928|ref|WP\_009156773.1|/1-407  
gi|498325812|ref|WP\_010639968.1|/1-402  
gi|498813298|ref|WP\_010843589.1|/1-407  
gi|499522065|ref|WP\_011208705.1|/1-413  
gi|501350690|ref|WP\_012382325.1|/1-394  
gi|502441549|ref|WP\_012787513.1|/1-393  
gi|502613546|ref|WP\_012850497.1|/1-418  
gi|502655470|ref|WP\_012891671.1|/1-407  
gi|502919509|ref|WP\_013154485.1|/1-387  
gi|502986999|ref|WP\_013221975.1|/1-393  
gi|502990184|ref|WP\_013225160.1|/1-393  
gi|503050335|ref|WP\_013285311.1|/1-407  
gi|503050339|ref|WP\_013285315.1|/1-405  
gi|503240107|ref|WP\_013474768.1|/1-407  
gi|503570755|ref|WP\_013804831.1|/1-409  
gi|503811777|ref|WP\_014045771.1|/1-386  
gi|503815878|ref|WP\_014049872.1|/1-399  
gi|503825139|ref|WP\_014059133.1|/1-387  
gi|503918520|ref|WP\_014152514.1|/1-392  
gi|504256667|ref|WP\_014443769.1|/1-404  
gi|504257577|ref|WP\_014444679.1|/1-406  
gi|504257578|ref|WP\_014444680.1|/1-404  
gi|504738714|ref|WP\_014925816.1|/1-407  
gi|504842985|ref|WP\_015030087.1|/1-430  
gi|504844162|ref|WP\_015031264.1|/1-388  
gi|505389052|ref|WP\_015576154.1|/1-402  
gi|505392891|ref|WP\_015579993.1|/1-392  
gi|505422443|ref|WP\_015609545.1|/1-397  
gi|506283335|ref|WP\_015803110.1|/1-409  
gi|506283336|ref|WP\_015803111.1|/1-415  
gi|506283628|ref|WP\_015803403.1|/1-403  
gi|514919902|ref|WP\_016641915.1|/1-409  
gi|514919903|ref|WP\_016641916.1|/1-407  
gi|515810185|ref|WP\_017240938.1|/1-387  
gi|516113040|ref|WP\_017543620.1|/1-387  
gi|516135498|ref|WP\_017566078.1|/1-387  
gi|516152946|ref|WP\_017583317.1|/1-387  
gi|516155702|ref|WP\_017584789.1|/1-387  
gi|516156105|ref|WP\_017584981.1|/1-370  
gi|516943734|ref|WP\_018177169.1|/1-406  
gi|517338648|ref|WP\_018514140.1|/1-389  
gi|517344820|ref|WP\_018520312.1|/1-399  
gi|517377906|ref|WP\_018552313.1|/1-399  
gi|517486865|ref|WP\_018657442.1|/1-413  
gi|517670242|ref|WP\_018840450.1|/1-410  
gi|517670243|ref|WP\_018840451.1|/1-407  
gi|517674585|ref|WP\_018844793.1|/1-407  
gi|517674586|ref|WP\_018844794.1|/1-410  
gi|517681181|ref|WP\_018851389.1|/1-410  
gi|517681182|ref|WP\_018851390.1|/1-407  
gi|517786148|ref|WP\_018956356.1|/1-391  
gi|517875708|ref|WP\_019045916.1|/1-413  
gi|517894413|ref|WP\_019064621.1|/1-386  
gi|517896443|ref|WP\_019066651.1|/1-386  
gi|518030937|ref|WP\_019201145.1|/1-408  
gi|518160542|ref|WP\_019330750.1|/1-386  
gi|518351335|ref|WP\_019521542.1|/1-406  
gi|518437260|ref|WP\_019607467.1|/1-410  
gi|518437261|ref|WP\_019607468.1|/1-408  
gi|518441023|ref|WP\_019611230.1|/1-387  
gi|518713392|ref|WP\_019874489.1|/1-404  
gi|518727905|ref|WP\_019888083.1|/1-387  
gi|518951707|ref|WP\_020107582.1|/1-407  
gi|518964500|ref|WP\_020120375.1|/1-386

gi|518973972|ref|WP\_020129847.1|/1-399  
gi|519328301|ref|WP\_020269269.1|/1-386  
gi|52090350|gb|AAR25849.1|/1-397  
gi|521088068|ref|WP\_020418973.1|/1-404  
gi|521984333|ref|WP\_020495604.1|/1-403  
gi|522000979|ref|WP\_020512250.1|/1-402  
gi|522028534|ref|WP\_020539743.1|/1-402  
gi|522028535|ref|WP\_020539744.1|/1-404  
gi|522123435|ref|WP\_020634644.1|/1-399  
gi|522127851|ref|WP\_020639060.1|/1-393  
gi|522151094|ref|WP\_020662302.1|/1-403  
gi|522161974|ref|WP\_020673182.1|/1-406  
gi|522161975|ref|WP\_020673183.1|/1-406  
gi|545317435|ref|WP\_021592180.1|/1-413  
gi|558889484|ref|WP\_023544221.1|/1-392  
gi|558978068|ref|WP\_023545659.1|/1-380  
gi|559794643|ref|WP\_023591359.1|/1-386  
gi|565875228|ref|WP\_023956546.1|/1-407  
gi|576475047|gb|EUA68593.1|/1-352  
gi|582998496|gb|EWC58928.1|/1-367  
gi|635327870|dbj|GAJ85604.1|/1-404  
gi|639153468|ref|WP\_024495106.1|/1-387  
gi|639159504|ref|WP\_024499951.1|/1-407  
gi|640152925|ref|WP\_024802725.1|/1-413  
gi|644659323|ref|WP\_025350295.1|/1-405  
gi|644679033|ref|WP\_025355925.1|/1-399  
gi|644683231|ref|WP\_025357202.1|/1-376  
gi|648280646|ref|WP\_026061795.1|/1-408  
gi|648523384|ref|WP\_026215135.1|/1-407  
gi|648548133|ref|WP\_026239884.1|/1-402  
gi|648554853|ref|WP\_026246604.1|/1-403  
gi|648649430|ref|WP\_026341181.1|/1-414  
gi|648650882|ref|WP\_026342629.1|/1-407  
gi|651270110|ref|WP\_026403293.1|/1-420  
gi|654221616|ref|WP\_027745810.1|/1-407  
gi|654221618|ref|WP\_027745811.1|/1-410  
gi|654253663|ref|WP\_027769110.1|/1-410  
gi|654253664|ref|WP\_027769111.1|/1-407  
gi|654459890|ref|WP\_027930301.1|/1-404  
gi|655047442|ref|WP\_028496036.1|/1-402  
gi|655250612|ref|WP\_028661294.1|/1-404  
gi|655468040|ref|WP\_028850977.1|/1-409  
gi|655468041|ref|WP\_028850978.1|/1-408  
gi|655859238|ref|WP\_028960884.1|/1-406  
gi|657301474|ref|WP\_029387156.1|/1-407  
gi|659852663|ref|WP\_029900100.1|/1-413  
gi|659885405|ref|WP\_029932112.1|/1-413  
gi|662076587|ref|WP\_030040241.1|/1-386  
gi|662123490|ref|WP\_030075241.1|/1-387  
gi|662750944|ref|WP\_030123213.1|/1-407  
gi|662753681|ref|WP\_030124974.1|/1-392  
gi|662754025|ref|WP\_030125189.1|/1-402  
gi|663127991|ref|WP\_030168866.1|/1-408  
gi|663133376|ref|WP\_030174220.1|/1-413  
gi|663147682|ref|WP\_030187778.1|/1-402  
gi|663152302|ref|WP\_030191876.1|/1-402  
gi|663175083|ref|WP\_030213740.1|/1-387  
gi|663185707|ref|WP\_030224108.1|/1-407  
gi|663185758|ref|WP\_030224157.1|/1-399  
gi|663234115|ref|WP\_030270420.1|/1-405  
gi|663287519|ref|WP\_030293342.1|/1-402  
gi|663296846|ref|WP\_030297694.1|/1-393  
gi|663315180|ref|WP\_030315064.1|/1-387  
gi|663331795|ref|WP\_030331313.1|/1-402  
gi|663358331|ref|WP\_030356818.1|/1-385  
gi|663384614|ref|WP\_030380764.1|/1-386  
gi|663411703|ref|WP\_030407153.1|/1-386  
gi|663721200|ref|WP\_030497787.1|/1-388  
gi|663723397|ref|WP\_030499781.1|/1-407  
gi|663723401|ref|WP\_030499785.1|/1-405  
gi|663739600|ref|WP\_030515586.1|/1-407  
gi|663744843|ref|WP\_030520685.1|/1-413  
gi|663996877|ref|WP\_030555062.1|/1-387

gi|664017342|ref|WP\_030565004.1|/1-394  
gi|664026764|ref|WP\_030570930.1|/1-389  
gi|664034034|ref|WP\_030575520.1|/1-400  
gi|664047850|ref|WP\_030587226.1|/1-387  
gi|664053373|ref|WP\_030592702.1|/1-386  
gi|664100718|ref|WP\_030638446.1|/1-392  
gi|664151367|ref|WP\_030686894.1|/1-387  
gi|664169191|ref|WP\_030703446.1|/1-394  
gi|664184342|ref|WP\_030718294.1|/1-386  
gi|664203367|ref|WP\_030736861.1|/1-402  
gi|664209462|ref|WP\_030742738.1|/1-387  
gi|664219864|ref|WP\_030752885.1|/1-375  
gi|664239975|ref|WP\_030772360.1|/1-386  
gi|664243905|ref|WP\_030776034.1|/1-386  
gi|664297466|ref|WP\_030826913.1|/1-399  
gi|664319150|ref|WP\_030847901.1|/1-402  
gi|664325184|ref|WP\_030853864.1|/1-386  
gi|664343898|ref|WP\_030872001.1|/1-399  
gi|664352685|ref|WP\_030880333.1|/1-402  
gi|664353893|ref|WP\_030881527.1|/1-407  
gi|664381983|ref|WP\_030908636.1|/1-395  
gi|664392127|ref|WP\_030918556.1|/1-405  
gi|664392130|ref|WP\_030918559.1|/1-411  
gi|664415157|ref|WP\_030940745.1|/1-388  
gi|664487291|ref|WP\_031007521.1|/1-388  
gi|664495979|ref|WP\_031015216.1|/1-386  
gi|664502408|ref|WP\_031021142.1|/1-406  
gi|664529628|ref|WP\_031046034.1|/1-387  
gi|664540072|ref|WP\_031055566.1|/1-386  
gi|664558349|ref|WP\_031073152.1|/1-386  
gi|664564529|ref|WP\_031079215.1|/1-386  
gi|664603682|ref|WP\_031113310.1|/1-334  
gi|665522791|ref|WP\_031125408.1|/1-390  
gi|665564592|ref|WP\_031148936.1|/1-395  
gi|665577278|ref|WP\_031155863.1|/1-395  
gi|671532910|ref|WP\_0331516709.1|/1-388  
gi|695847173|ref|WP\_032760436.1|/1-390  
gi|695859327|ref|WP\_032772269.1|/1-402  
gi|696341807|ref|WP\_032916959.1|/1-383  
gi|696352293|ref|WP\_032927445.1|/1-382  
gi|702575542|ref|WP\_033206870.1|/1-387  
gi|702597822|ref|WP\_033215973.1|/1-386  
gi|702658602|ref|WP\_033233753.1|/1-409  
gi|702699692|ref|WP\_033242536.1|/1-416  
gi|702731349|ref|WP\_033249506.1|/1-402  
gi|702780508|ref|WP\_033262786.1|/1-392  
gi|702790925|ref|WP\_033265341.1|/1-387  
gi|702825262|ref|WP\_033276316.1|/1-409  
gi|702901190|ref|WP\_033302858.1|/1-407  
gi|702901193|ref|WP\_033302860.1|/1-409  
gi|702903959|ref|WP\_033304249.1|/1-402  
gi|703073540|ref|WP\_033343121.1|/1-404  
gi|703223592|ref|WP\_033385364.1|/1-386  
gi|716909645|ref|WP\_033525202.1|/1-385  
gi|733419836|gb|KHL09106.1|/1-402  
gi|733426593|gb|KHL16039.1|/1-406  
gi|733426628|gb|KHL16074.1|/1-413  
gi|737453567|ref|WP\_035433771.1|/1-377  
gi|737787082|ref|WP\_035754826.1|/1-407  
gi|738599340|ref|WP\_036509811.1|/1-407  
gi|738627178|ref|WP\_036536733.1|/1-413  
gi|739355249|ref|WP\_037217057.1|/1-408  
gi|739395976|ref|WP\_037256544.1|/1-386  
gi|739449847|ref|WP\_037309827.1|/1-399  
gi|739451187|ref|WP\_037311165.1|/1-385  
gi|739485427|ref|WP\_037345180.1|/1-396  
gi|739499266|ref|WP\_037358982.1|/1-403  
gi|739764270|ref|WP\_037616712.1|/1-399  
gi|739767430|ref|WP\_037619759.1|/1-407  
gi|739779504|ref|WP\_037631564.1|/1-395  
gi|739790933|ref|WP\_037642993.1|/1-409  
gi|739840454|ref|WP\_037691383.1|/1-387  
gi|739860567|ref|WP\_037711347.1|/1-385

gi|739894178|ref|WP\_037744788.1|/1-387  
gi|739896506|ref|WP\_037747103.1|/1-410  
gi|739896508|ref|WP\_037747105.1|/1-407  
gi|739909573|ref|WP\_037759973.1|/1-378  
gi|739968003|ref|WP\_037818264.1|/1-403  
gi|739978975|ref|WP\_037829144.1|/1-392  
gi|739981360|ref|WP\_037831518.1|/1-407  
gi|739982267|ref|WP\_037832386.1|/1-395  
gi|739997181|ref|WP\_037847001.1|/1-397  
gi|739998220|ref|WP\_037848040.1|/1-395  
gi|740725610|ref|WP\_038510896.1|/1-396  
gi|740725618|ref|WP\_038510904.1|/1-406  
gi|746556901|ref|WP\_039587620.1|/1-408  
gi|747654596|emb|CEL19878.1|/1-396  
gi|748209373|ref|WP\_039780061.1|/1-407  
gi|748226937|ref|WP\_039797625.1|/1-413  
gi|748272976|ref|WP\_039818647.1|/1-413  
gi|748286222|ref|WP\_039827880.1|/1-413  
gi|750205404|ref|WP\_040509478.1|/1-407  
gi|750214272|ref|WP\_040518345.1|/1-407  
gi|750219387|ref|WP\_040523460.1|/1-408  
gi|750226805|ref|WP\_040530460.1|/1-407  
gi|750430442|ref|WP\_040712332.1|/1-408  
gi|750430675|ref|WP\_040712565.1|/1-408  
gi|750432963|ref|WP\_040714852.1|/1-413  
gi|750435932|ref|WP\_040717816.1|/1-407  
gi|750450774|ref|WP\_040732647.1|/1-413  
gi|750451405|ref|WP\_040733278.1|/1-382  
gi|750465036|ref|WP\_040746909.1|/1-413  
gi|750503992|ref|WP\_040785862.1|/1-413  
gi|750520091|ref|WP\_040801961.1|/1-413  
gi|750548630|ref|WP\_040830499.1|/1-407  
gi|750584402|ref|WP\_040866271.1|/1-316  
gi|751917270|ref|WP\_041132197.1|/1-387  
gi|753806987|ref|WP\_041562627.1|/1-413  
gi|754807677|ref|WP\_042170708.1|/1-386  
gi|754828717|ref|WP\_042191150.1|/1-401  
gi|754828719|ref|WP\_042191152.1|/1-404  
gi|754904375|ref|WP\_042262755.1|/1-413  
gi|755909665|gb|AJK53243.1|/1-383  
gi|755911249|gb|AJK54827.1|/1-396  
gi|759504734|ref|WP\_043225422.1|/1-399  
gi|759506997|ref|WP\_043227664.1|/1-391  
gi|759526808|ref|WP\_043246995.1|/1-402  
gi|759542926|ref|WP\_043262817.1|/1-371  
gi|759679696|ref|WP\_043396905.1|/1-379  
gi|759747078|ref|WP\_043457635.1|/1-412  
gi|759829058|ref|WP\_043524887.1|/1-390  
gi|759829059|ref|WP\_043524888.1|/1-404  
gi|759837155|ref|WP\_043532787.1|/1-404  
gi|759937225|ref|WP\_043622369.1|/1-405  
gi|759937228|ref|WP\_043622372.1|/1-407  
gi|759968849|ref|WP\_043652708.1|/1-413  
gi|759982749|ref|WP\_043666576.1|/1-413  
gi|760009894|ref|WP\_043693201.1|/1-413  
gi|760032393|ref|WP\_043715369.1|/1-385  
gi|760043628|ref|WP\_043726604.1|/1-413  
gi|760100863|ref|WP\_043783089.1|/1-393  
gi|760104832|ref|WP\_043787036.1|/1-385  
gi|760147522|ref|WP\_043828638.1|/1-403  
gi|766794613|ref|WP\_044851354.1|/1-391  
gi|766802188|ref|WP\_044854793.1|/1-399  
gi|769943012|ref|WP\_045076322.1|/1-404  
gi|770210296|gb|KJK47314.1|/1-373  
gi|772640488|ref|WP\_045276112.1|/1-403  
gi|772707913|ref|WP\_045297324.1|/1-403  
gi|780298877|ref|WP\_045551145.1|/1-400  
gi|783374990|ref|WP\_045710340.1|/1-387  
gi|786070271|ref|WP\_045747288.1|/1-404  
gi|806820864|emb|CQD11231.1|/1-391  
gi|808092952|ref|WP\_046251298.1|/1-386  
gi|817531685|ref|WP\_046581925.1|/1-402  
gi|817531696|ref|WP\_046581936.1|/1-407

gi|820274763|ref|WP\_046733741.1|/1-386  
gi|820825480|ref|WP\_046776559.1|/1-395  
gi|822058218|ref|WP\_046911552.1|/1-387  
gi|822066430|ref|WP\_046919591.1|/1-386  
gi|824056803|ref|WP\_047122229.1|/1-409  
gi|827012560|ref|WP\_047174925.1|/1-391  
gi|836722752|ref|WP\_047854816.1|/1-380  
gi|837747836|ref|WP\_047868171.1|/1-404  
gi|84569564|gb|ABC59140.1|/1-413  
gi|847060967|ref|WP\_047960484.1|/1-401  
gi|860594480|ref|WP\_048475297.1|/1-397  
gi|873280729|ref|WP\_048574157.1|/1-387  
gi|889614010|ref|WP\_048833328.1|/1-413  
gi|890485412|ref|WP\_048889431.1|/1-385  
gi|893632831|emb|CNG21174.1|/1-414  
gi|898210953|ref|WP\_049558260.1|/1-407  
gi|898211000|ref|WP\_049558261.1|/1-404  
gi|910260451|ref|WP\_050064612.1|/1-409  
gi|913061610|ref|WP\_050363044.1|/1-391  
gi|915816354|ref|WP\_050897055.1|/1-384  
gi|916305962|ref|WP\_051041008.1|/1-387  
gi|916653803|ref|WP\_051260894.1|/1-421  
gi|917034511|ref|WP\_051641223.1|/1-391  
gi|917089852|ref|WP\_051696564.1|/1-401  
gi|917127830|ref|WP\_051734542.1|/1-395  
gi|917159781|ref|WP\_051766493.1|/1-388  
gi|917200164|ref|WP\_051806876.1|/1-395  
gi|917201966|ref|WP\_051808678.1|/1-395  
gi|917266752|ref|WP\_051873464.1|/1-371  
gi|917415193|ref|WP\_052021905.1|/1-368  
gi|918438383|ref|WP\_052489559.1|/1-406  
gi|918573215|ref|WP\_052518586.1|/1-380  
gi|918708723|ref|WP\_052577717.1|/1-402  
gi|919508803|ref|WP\_052841284.1|/1-386  
gi|921028059|ref|WP\_053067007.1|/1-379  
gi|921195798|ref|WP\_053141200.1|/1-386  
gi|924907287|ref|WP\_053558911.1|/1-402  
gi|924907396|ref|WP\_053559020.1|/1-407  
gi|924907397|ref|WP\_053559021.1|/1-411  
gi|925377772|gb|KOU13456.1|/1-373  
gi|925382341|gb|KOU17726.1|/1-375  
gi|925405197|gb|KOU39456.1|/1-393  
gi|925406039|gb|KOU40346.1|/1-373  
gi|925438397|gb|KOU70732.1|/1-373  
gi|925449428|gb|KOU81249.1|/1-373  
gi|925450843|gb|KOU82603.1|/1-373  
gi|925543006|gb|KOV69648.1|/1-385  
gi|925583494|gb|KOX08038.1|/1-398  
gi|926281066|ref|WP\_053618364.1|/1-387  
gi|926287188|ref|WP\_053624075.1|/1-402  
gi|926297202|ref|WP\_053633099.1|/1-395  
gi|926299654|ref|WP\_053635348.1|/1-399  
gi|926322276|ref|WP\_053656626.1|/1-405  
gi|926322591|ref|WP\_053656941.1|/1-406  
gi|926330291|ref|WP\_053664498.1|/1-387  
gi|926349130|ref|WP\_053681030.1|/1-395  
gi|926353189|ref|WP\_053684828.1|/1-395  
gi|926355056|ref|WP\_053685994.1|/1-395  
gi|926363140|ref|WP\_053693227.1|/1-401  
gi|926388905|ref|WP\_053717297.1|/1-383  
gi|926393692|ref|WP\_053722084.1|/1-379  
gi|926399921|ref|WP\_053728033.1|/1-387  
gi|926416214|ref|WP\_053743774.1|/1-392  
gi|927068162|ref|WP\_053778391.1|/1-412  
gi|927088964|ref|WP\_053788724.1|/1-393  
gi|927894878|ref|WP\_053847139.1|/1-385  
gi|930530215|ref|WP\_054244342.1|/1-399  
gi|931596542|ref|WP\_054290443.1|/1-394  
gi|931596543|ref|WP\_054290444.1|/1-402  
gi|937155882|ref|WP\_054564248.1|/1-408  
gi|937181706|ref|WP\_054571226.1|/1-400  
gi|939044105|ref|WP\_054814702.1|/1-406  
gi|942695809|ref|WP\_055400477.1|/1-399

gi|943387208|ref|WP\_055421380.1|/1-386  
gi|943647853|ref|WP\_055475823.1|/1-407  
gi|943892698|ref|WP\_055530969.1|/1-386  
gi|943924202|ref|WP\_055558718.1|/1-390  
gi|943938133|ref|WP\_055567660.1|/1-385  
gi|943967624|ref|WP\_055573099.1|/1-387  
gi|943969892|ref|WP\_055573676.1|/1-407  
gi|943969897|ref|WP\_055573677.1|/1-409  
gi|943971880|ref|WP\_055574189.1|/1-400  
gi|944005401|ref|WP\_055597898.1|/1-402  
gi|944008933|ref|WP\_055600600.1|/1-387  
gi|944013569|ref|WP\_055604496.1|/1-400  
gi|944014553|ref|WP\_055605476.1|/1-387  
gi|944014557|ref|WP\_055605480.1|/1-409  
gi|944014558|ref|WP\_055605481.1|/1-407  
gi|944037902|ref|WP\_055625824.1|/1-402  
gi|944148099|ref|WP\_055640398.1|/1-391  
gi|944396129|ref|WP\_055689139.1|/1-407  
gi|944396134|ref|WP\_055689144.1|/1-387  
gi|944411283|ref|WP\_055692959.1|/1-387  
gi|944411288|ref|WP\_055692964.1|/1-409  
gi|944411289|ref|WP\_055692965.1|/1-407  
gi|944411511|ref|WP\_055693187.1|/1-400  
gi|947707775|ref|WP\_056370145.1|/1-403  
gi|947904106|ref|WP\_056564351.1|/1-387  
gi|947987288|ref|WP\_056646825.1|/1-387  
gi|948048861|ref|WP\_056707889.1|/1-405  
gi|948049530|ref|WP\_056708558.1|/1-391  
gi|948130005|ref|WP\_056788418.1|/1-389  
gi|948134056|ref|WP\_056792429.1|/1-402  
gi|948134526|ref|WP\_056792882.1|/1-407  
gi|948162411|ref|WP\_056820593.1|/1-413  
gi|948162625|ref|WP\_056820791.1|/1-413  
gi|948238624|ref|WP\_056896261.1|/1-405  
gi|950084237|ref|WP\_057169757.1|/1-389  
gi|951115817|ref|WP\_057602206.1|/1-399  
gi|951130288|ref|WP\_057613556.1|/1-385  
gi|960358558|ref|WP\_058251559.1|/1-407  
gi|970977742|ref|WP\_058846473.1|/1-386  
gi|971848451|ref|WP\_058917468.1|/1-409  
gi|972356355|ref|WP\_059011391.1|/1-386  
gi|973258584|gb|KUL25514.1|/1-404  
gi|973400757|ref|WP\_059142963.1|/1-387  
gi|973830118|gb|KUN00584.1|/1-387  
gi|973867405|gb|KUN37082.1|/1-386  
gi|974606981|ref|WP\_059196811.1|/1-387  
gi|974621402|ref|WP\_059210998.1|/1-385  
gi|976135665|ref|WP\_059296625.1|/1-386  
gi|976136181|ref|WP\_059297036.1|/1-409  
gi|976136182|ref|WP\_059297037.1|/1-407  
gi|980324834|emb|CUU58078.1|/1-400  
gi|980329829|emb|CUU56011.1|/1-408  
gi|982002289|ref|WP\_060179262.1|/1-395  
gi|983428195|ref|WP\_060592037.1|/1-413  
gi|983498834|ref|WP\_060651966.1|/1-408  
gi|995884919|ref|WP\_061082298.1|/1-387
